# Supplementary material for: Trends in obesity across Canada from 2005 to 2018: a consecutive cross-sectional population-based study
Source: PubMed Central journal article supplement — CMAJ Open. 2022 May 24;10(2):E439–49. doi: 10.9778/cmajo.20210205 (PMC9259440; doi:10.9778/cmajo.20210205), 2022-05-24
Supplement: open-2021-0205-1-at.pdf [file open-2021-0205-1-at.pdf]

Supplemental Table S1. List of Canadian Community Health Survey (CCHS) questions and answer categories included in our study.

| <b>CCHS concept</b>                        | <b>CCHS questionnaire item / literal question text</b> | <b>Universe</b>                          | <b>Answer Categories</b>                                                                                                                                                                                                                                                                                                                                                                                |
|--------------------------------------------|--------------------------------------------------------|------------------------------------------|---------------------------------------------------------------------------------------------------------------------------------------------------------------------------------------------------------------------------------------------------------------------------------------------------------------------------------------------------------------------------------------------------------|
| <b>Sex</b>                                 | Is [respondent name] male or female?                   | All respondents                          | Male<br>Female                                                                                                                                                                                                                                                                                                                                                                                          |
| <b>Age</b>                                 | What is your age?                                      | All respondents                          | Age between 12 and 14<br>Age between 15 and 17<br>Age between 18 and 19<br>Age between 20 and 24<br>Age between 25 and 29<br>Age between 30 and 34<br>Age between 35 and 39<br>Age between 40 and 44<br>Age between 45 and 49<br>Age between 50 and 54<br>Age between 55 and 59<br>Age between 60 and 64<br>Age between 65 and 69<br>Age between 70 and 74<br>Age between 75 and 79<br>Age 80 and older |
| <b>Province of residence of respondent</b> | Province of residence of respondent                    | All respondents                          | Newfoundland and Labrador<br>Prince Edward island<br>Nova Scotia<br>New Brunswick<br>Quebec<br>Ontario<br>Manitoba<br>Saskatchewan<br>Alberta<br>British Columbia<br>Yukon<br>Northwest territories<br>Nunavut                                                                                                                                                                                          |
| <b>Body mass index (self-reported)</b>     |                                                        | All respondents excluding pregnant women | Derived variable.<br>BMI calculated from both self-reported height and self-reported weight values. BMI is calculated by dividing weight in kilograms by height in metres squared. BMI = WEIGHT (KG) / HEIGHT (METRES) SQUARED                                                                                                                                                                          |
