# Supplementary material for: Trends in obesity across Canada from 2005 to 2018: a consecutive cross-sectional population-based study
Source: PubMed Central journal article supplement — CMAJ Open. 2022 May 24;10(2):E439–49. doi: 10.9778/cmajo.20210205 (PMC9259440; doi:10.9778/cmajo.20210205), 2022-05-24
Supplement: open-2021-0205-original-submission.pdf [file open-2021-0205-original-submission.pdf]

## Worsening Obesity Across Canada and Concerns for COVID-19 Pandemic Severity

Ellina Lytvyak, MD, PhD <sup>1</sup>

Sebastian Straube, BM BCh, MA (Oxon), DPhil <sup>1</sup>

Renuca Modi, MD, CCFP, FCFP <sup>2,3</sup>

Karen K Lee, MD, MHSc, FRCPC <sup>1</sup>

<sup>1</sup> Division of Preventive Medicine, Department of Medicine, University of Alberta, Edmonton, Canada

<sup>2</sup> Department of Family Medicine, University of Alberta, Edmonton, Canada

<sup>3</sup> Edmonton Adult Bariatric Specialty Clinic, Alberta Health Services, Canada

### Corresponding author

Ellina Lytvyak

[lytvyak@ualberta.ca](mailto:lytvyak@ualberta.ca)

### Funding statement

This project has been made possible in part through funding from Dr. Karen K Lee's University of Alberta Faculty of Medicine and Dentistry research funds.

## Abstract

### Background

Our study analyzed and described national and provincial/territorial obesity trends in the Canadian adult population from 2005 through 2017-18, to understand potential implications of obesity trends on the COVID-19 pandemic.

### Methods

Data from 746,408 Canadian Community Health Survey (CCHS) adult survey participants (403,582 females and 342,826 males) were obtained from seven consecutive cycles (CCHS<sub>2005</sub> – CCHS<sub>2017-18</sub>). Obesity prevalence (adjusted BMI $\geq$ 30.00 kg/m<sup>2</sup>) was a primary outcome variable. Obesity rates across CCHS cycles and trends over time were analyzed using Pearson's chi-squared test with Bonferroni's p-value adjustment, and Cochran-Armitage test of trend. P-value $\leq$ 0.05 indicated statistical significance.

### Results

Canada-wide obesity prevalence increased significantly between 2005 and 2017-18, from 22.2% to 27.2% (p<0.001). Increases were observed across both sexes, all age groups, and all Canadian provinces/territories (p<0.001). In 2017-18, obesity prevalence was higher among males than females (28.9% vs. 25.4%; p<0.001); Canadian adults in their 60s, 50s and 40s had obesity prevalence exceeding 30%. In 2017-18, Newfoundland and Labrador had the highest (39.4%), and British Columbia – the lowest (22.8%) obesity rate. Over 14 years, Quebec and Alberta exhibited the largest relative increases in obesity.

### Interpretation

In 2017-18, approximately 1 in 4 adult Canadians lives with obesity, the highest-ever rate. With obesity identified as a key risk factor for COVID-19 infection acquisition, morbidity and mortality, these trends may be contributing to the severity of the COVID-19 pandemic in Canada. Our findings call for urgent actions to identify, develop, implement and evaluate solutions for obesity prevention

and management in all Canadian provinces and territories.

Confidential

1  
2  
3  
4  
5  
6  
7  
8  
9  
10  
11  
12  
13  
14  
15  
16  
17  
18  
19  
20  
21  
22  
23  
24  
25  
26  
27  
28  
29  
30  
31  
32  
33  
34  
35  
36  
37  
38  
39  
40  
41  
42  
43  
44  
45  
46  
47  
48  
49  
50  
51  
52  
53  
54  
55  
56  
57  
58  
59  
60

## Introduction

Currently, the world including Canada finds itself within a coronavirus disease (COVID-19) pandemic and pandemic-related impacts on health, well-being, healthcare and economy <sup>1</sup>. Much attention has rightly focused on attempts to mitigate negative impacts and control the infection. Underlying conditions such as obesity and chronic diseases have now been identified as key risk factors for acquisition and severity of COVID-19 infection including hospitalizations, ICU admissions and death <sup>2-11</sup>.

According to WHO, obesity continues to advance across every region and socioeconomic class and becomes a global epidemic with over 13% of adults worldwide affected <sup>12</sup>. Obesity is a progressive, multifactorial, chronic disease with high risks of relapse and recurrence <sup>13</sup>. Up to 12.0% of Canadian health expenditures are attributed to obesity; annual costs exceed 11 billion dollars <sup>14</sup>. It is a major cause of multiple comorbidities, including type II diabetes, cardiovascular diseases, nonalcoholic fatty liver disease, osteoarthritis, chronic kidney disease, chronic back pain, and many cancer types, many of which also increase morbidity and mortality risks from COVID-19 <sup>15-22</sup>.

Canadian population-wide adult obesity trend studies using multiple consecutive cross-sectional surveys at national/provincial/territorial levels are scarce, outdated, and do not include data from multiple consecutive years and trend analyses <sup>23-28</sup>. Exploring the prevalence and trends of obesity may assist in our understanding of the potential severity of COVID-19 morbidity and mortality within our population. In our study, the aim was to describe and analyze obesity trends at national and provincial/territorial levels in the adult Canadian population from 2005 through 2017-18 and discuss potential implications for the COVID-19 pandemic.

## Methods

### *Study design*

Data were obtained from seven consecutive cycles of the Canadian Community Health Survey (from CCHS<sub>2005</sub> to CCHS<sub>2017-18</sub>) <sup>29-35</sup>. CCHS is a Canada-wide cross-sectional survey with a complex,

1  
2  
3 multistage, multi-frame, stratified sampling design that collects information related to health status,  
4 healthcare utilization and health determinants from a large national sample of survey respondents to  
5 provide estimates for the whole Canadian population <sup>36</sup>. The CCHS targets persons aged 12 years  
6 and older who are living in private dwellings in the ten provinces and three territories. Persons living  
7 on Indian Reserves or Crown lands, those residing in institutions, full-time members of the Canadian  
8 Forces and residents of certain remote regions are excluded from this survey. The CCHS covers  
9 approximately 98% of the Canadian population aged 12 and older <sup>36</sup>. Further details about CCHS  
10 methodology are found elsewhere <sup>36</sup>. The eligibility criteria for our study participants included: being  
11 an adult ( $\geq 18$  y.o.) participant in at least one of the seven consecutive CCHS cycles, with BMI values  
12 available. Our study design and step-by-step methodological approach are presented in Fig. 1. The  
13 variables used in this study consisted of sex and age, province of residence and BMI. Sex-specific  
14 correction equations developed by *Gorber* and colleagues (*Reduced model 4* as recommended)  
15 were applied to self-reported BMI to produce adjusted BMI estimates which yield estimates  
16 maximally in line with measured ones <sup>37-39</sup>. Adjusted BMI (a number with two decimals) was further  
17 used to categorize individuals into corresponding weight status categories <sup>40-42</sup>.

### 34 *Primary outcome*

35  
36 Obesity prevalence was the primary outcome variable. Individuals were defined as being obese with  
37 an adjusted BMI of 30.00 kg/m<sup>2</sup> or higher.  
38  
39  
40

### 41 *Statistical analysis*

42  
43 For statistical estimates produced from the CCHS data to be accurate and representative of the  
44 Canadian population and not just the sample, standardized survey weights were incorporated in  
45 calculations and applied before statistical analyses were performed <sup>43</sup>. Categorical data were  
46 presented as proportions and counts. Comparisons of obesity prevalence rates across CCHS cycles  
47 were performed using two-tailed Pearson's chi-squared test and post-hoc paired comparisons on  
48 each pair of CCHS cycles with p-value adjustment according to the Bonferroni method for multiple  
49 pairwise comparisons. Trends in obesity prevalence over time were analyzed using the Cochran-  
50  
51  
52  
53  
54  
55  
56  
57  
58  
59  
60

1  
2  
3 Armitage test of trend. All statistical analyses and data visualization were performed using SPSS  
4 23.0, GraphPad Prism 6.0, and Tableau Public 2020.3, with a  $p\text{-value}\leq 0.05$  indicating statistical  
5 significance<sup>44–46</sup>.  
6  
7  
8  
9

### 10 *Ethics approval*

11  
12 Our study was exempt from need for the University of Alberta Research Ethics Board review as  
13 CCHS Public use microdata files (PUMFS) produced by Statistics Canada are publicly accessible  
14 via the Data Liberation Initiative.  
15  
16  
17  
18  
19

### 20 **Results**

21  
22 Our study sample consisted of 746,408 CCHS survey respondents (403,582 females and 342,826  
23 males). Main demographic characteristics of the study participants are presented in Table 1.  
24  
25 Individuals in their 50s had the largest share in the study population compared to other age  
26 categories for the first three CCHS cycles, shifting to older groups in their 60s later, mirroring aging  
27 of the Canadian population. Geographic area distributions were consistent throughout cycles.  
28  
29  
30  
31  
32  
33

34 In 2005, Canada-wide obesity prevalence was 22.2% and over 14 years increased significantly  
35 reaching the ever-highest level of 27.2% in 2017-18;  $p<0.001$  (Table 2; Fig. 5). Obesity prevalence  
36 rates had been rising gradually demonstrating stepwise temporal patterns.  
37  
38  
39  
40

41 Obesity prevalence in 2005 among males was substantially higher than in females (24.0% vs.  
42 20.4%;  $p<0.001$ ). Over the following 14 years, obesity rates increased in both sexes, with females  
43 experiencing a larger increase. By 2017-18, the obesity rate among males continued to be  
44 significantly higher in comparison to females (28.9% vs. 25.4%;  $p<0.001$ ) (Table 2; Fig. 2).  
45  
46  
47  
48  
49  
50

51 Age-wise, in 2005, adults in their 60s and 50s had the highest obesity rates, followed by adults in  
52 their 40s (28.0%, 27.8%, and 23.8% respectively). Over the next 14 years, obesity rates rose  
53 significantly in all age groups with the largest increase among people in their 40s ( $p<0.001$ ). By  
54  
55  
56  
57  
58  
59  
60

1  
2  
3 2017-18, obesity rates among Canadians in their 60s, 50s, and 40s were 32.3%, 31.4%, and 30.9%,  
4  
5 respectively (Table 2; Fig. 3).  
6  
7

8  
9 In 2005, British Columbia and Quebec had the lowest obesity prevalence (19.2% and 20.1%,  
10  
11 respectively) while Newfoundland and Labrador New Brunswick and Prince Edward Island had the  
12  
13 highest rates of 33.5%, 30.9% and 30.1%, respectively. All provinces and territories showed  
14  
15 increases in obesity prevalence from 2005 to 2017-18 ( $p < 0.001$ ), with the highest rate remaining in  
16  
17 Newfoundland and Labrador at 39.4% and the lowest rate in British Columbia at 22.8%. Over the 14  
18  
19 years, Quebec and Alberta demonstrated the largest relative increases in obesity prevalence (Table  
20  
21 2; Fig. 4-6). There were statistically significant differences in obesity prevalence across CCHS cycles  
22  
23 for both sexes, all age categories, and at national and provincial/territorial levels ( $p < 0.001$ ). Findings  
24  
25 of subsequent pairwise comparisons were consistent with obesity rates being markedly different  
26  
27 between each CCHS cycle Canada-wide ( $p < 0.001$ ). In 2017-18, sex-specific, age-specific, and  
28  
29 national and provincial/territorial obesity rates were significantly higher compared to those in 2005  
30  
31 ( $p < 0.001$ ). Furthermore, from 2005 through 2017-18, there was a statistically significant increasing  
32  
33 linear trend in obesity prevalence in both sexes, all age groups, Canada-wide, and in all  
34  
35 provinces/territories (Cochran-Armitage test of trend,  $p < 0.001$ ) (Table 2; Fig. 2-4).  
36  
37

### 38 **Interpretation**

39  
40 Our study findings demonstrate that adult obesity prevalence in Canada increased from 22.2% in  
41  
42 2005 to 27.2% in 2017-18, the highest-ever rate. This trend was observed across sexes, various age  
43  
44 categories, all provinces and territories. Those tendencies are comparable with global data and other  
45  
46 high-income English-speaking countries, reflecting consistently increasing trends in obesity  
47  
48 prevalence worldwide <sup>47-49</sup>.  
49  
50

51  
52 No prior Canada-wide analyses of obesity prevalence have been performed for the period from 2005  
53  
54 through 2017-18, the latest nationwide data available. The previous peer-reviewed publication  
55  
56 comparing obesity prevalence between non-consecutive CCHS cycles was based on data up to  
57  
58  
59  
60

1  
2  
3 2013<sup>28</sup>. We analyzed data from seven consecutive CCHS cycles, representing the most  
4 comprehensive trend analyses to our knowledge. Additionally, we applied well-defined and robust  
5 methodological processes: defined explicit inclusion/exclusion criteria, included the 18-19 year-old  
6 age category, did not exclude the underweight category from analyses, re-derived weight categories  
7 based on two-decimal point BMI value to improve precision, and used correction equations.  
8  
9 Therefore, it is challenging to directly compare our findings with the results of other studies.  
10  
11  
12  
13  
14  
15  
16

17 Trajectory of obesity trends in Canada nationally and across provinces/territories is increasing  
18 alarmingly. In our study, obesity trends in Canada are explored to gain some understanding of  
19 potential implications for the current COVID-19 pandemic. There is overwhelming evidence that  
20 obesity is a key risk factor for the acquisition of COVID-19 infection and a strong predictor of its  
21 adverse outcomes. Obesity was deemed to be associated with an up to 2.1-fold higher risk for  
22 severe COVID-19 infection, 2.4-fold – for hospitalization, 5.3-fold – for ICU admission, 7.4-fold – for  
23 invasive mechanical ventilation support, and 2.7-fold higher risk for mortality<sup>2-11</sup>. A recent meta-  
24 analysis has also demonstrated a linear relationship between BMI and COVID infection severity and  
25 mortality<sup>5</sup>. In the context of the COVID-19 pandemic, obesity trends seen in Canada are potentially  
26 presenting important risks and challenges regarding infection acquisition, severity and mortality.  
27  
28  
29  
30  
31  
32  
33  
34  
35  
36  
37

38 Recent meta-analyses suggest that male sex is an independent risk factor for severe COVID-19  
39 infection, ICU admission and death with odds reaching as high as 2.84 compared to females<sup>50,51</sup>.  
40 The male population in Canada is also characterized by higher rates of smoking and underlying  
41 diseases, such as diabetes, hypertension and COPD, with those factors independently at least  
42 doubling the risk for severe and morbid COVID-infection<sup>4,50,52-57</sup>. Coupled with the higher  
43 prevalence of obesity among males demonstrated in our study it poses a significant concern that  
44 cannot be disregarded.  
45  
46  
47  
48  
49  
50  
51  
52

53 In multiple studies across the world, age has been repeatedly identified as a major risk factor for  
54 disease progression, critical and morbid COVID-19 infection, with a case fatality ratio increasing  
55  
56  
57  
58  
59  
60



1  
2  
3 progressively with age and reaching 1.3% and 3-5% among patients in their 50s and 60s,  
4  
5 respectively, in comparison to 0.4% among those in the 40s or younger <sup>58-63</sup>. Because every third  
6  
7 Canadian adult in their 50s and 60s lives with obesity, those age groups have the highest obesity  
8  
9 rates, it also creates significant challenges for preventing undesirable COVID-19 outcomes.  
10

11  
12  
13 Future studies should model variations of COVID-19 outcomes among provinces with variations in  
14  
15 underlying chronic risk conditions, such as obesity and obesity-related chronic diseases at  
16  
17 population levels. Further studies are also needed for their effective prevention and management, for  
18  
19 example, by assessing temporal obesity patterns in the context of socio-demographic and  
20  
21 behavioural factors in Canada. It would also be important to evaluate intervention efforts among  
22  
23 physicians (in primary care, those specializing in obesity medicine, and specialists treating  
24  
25 comorbidities); public health professionals; various stakeholders at municipal/provincial/federal  
26  
27 levels including policymakers, urban planners and developers shaping community environments;  
28  
29 community organizations; the pharmaceutical industry; employers; academia; and those living with  
30  
31 obesity. In 2017, the Chief Public Health Officer of Canada released the report “Designing Healthy  
32  
33 Living” in a call to action to improve our community environments in support of healthy living <sup>64</sup>.  
34  
35 Implementing and evaluating innovative interventions already demonstrated to reverse longstanding  
36  
37 obesity trends at a population level should be a priority for all Canadian provinces/territories <sup>64,65,74-  
38  
39 79,66-73</sup>. For example, in Alberta, policy and environmental approaches that successfully reversed  
40  
41 childhood obesity trends and increased life expectancies from chronic diseases in New York in  
42  
43 2002-2013 are being developed and evaluated through the *Housing for Health* initiative funded by  
44  
45 the Public Health Agency of Canada <sup>80</sup>. Learning from the US experience, the University of Alberta’s  
46  
47 Public Health and Preventive Medicine Residency Program and patient-care partners are also  
48  
49 currently developing and piloting the first Obesity Medicine Fellowship Program in Canada.  
50

## 51 **Limitations**

52  
53 Analyzing a series of cross-sectional studies does not assess for a definitive trend over time due to  
54  
55 the lack of a clear longitudinal component. Recall, selection, observer and social acceptability biases  
56  
57  
58  
59  
60

1  
2  
3 along with weight stigma influence could also not be ruled out. BMI as a proxy of weight status does  
4 not take into consideration ethnicity, sex and body composition and can be an inaccurate marker of  
5 adiposity with high specificity, but low-to-moderate sensitivity<sup>81,82</sup>. Nevertheless, BMI is shown as a  
6 reliable standardized weight status measure at the population level<sup>81-86</sup>. The robustness of  
7 relationships between BMI, obesity-related comorbidities and mortality also reflects its high utility  
8 and reliability<sup>87</sup>. Tendency to under-report weight and over-report height, especially among obese  
9 people, youth and females can lead to underestimating obesity rates but helps avoid overestimation  
10  
11  
12  
13  
14  
15  
16  
17  
18  
19  
20  
21  
22  
23  
24  
25  
26  
27  
28  
29  
30  
31  
32  
33  
34  
35  
36  
37  
38  
39  
40  
41  
42  
43  
44  
45  
46  
47  
48  
49  
50  
51  
52  
53  
54  
55  
56  
57  
58  
59  
60

along with weight stigma influence could also not be ruled out. BMI as a proxy of weight status does not take into consideration ethnicity, sex and body composition and can be an inaccurate marker of adiposity with high specificity, but low-to-moderate sensitivity<sup>81,82</sup>. Nevertheless, BMI is shown as a reliable standardized weight status measure at the population level<sup>81-86</sup>. The robustness of relationships between BMI, obesity-related comorbidities and mortality also reflects its high utility and reliability<sup>87</sup>. Tendency to under-report weight and over-report height, especially among obese people, youth and females can lead to underestimating obesity rates but helps avoid overestimation<sup>88-92</sup>. However, unless tendency to under-reporting and over-reporting varies over time, this should not impact temporal trends. Self-reported anthropometric measurements correlate strongly with measured ones and can be used in epidemiological studies<sup>93-96</sup>. To overcome potential divergence, we applied correction equations developed and utilized by Statistics Canada to self-reported BMI estimates to produce adjusted BMI estimates maximally in line with measured ones<sup>37-39</sup>.

## Conclusion

- Approximately 1 in 4 adult Canadians lives with obesity.
- Obesity rate among adult Canadians increased by 23% since 2005 and in 2017-18 was at the ever-highest level of 27.2%.
- Obesity prevalence increased across sexes, age groups, and all Canadian provinces and territories from 2005 to 2017-18.
- Obesity prevalence among males is substantially higher than in females, this pattern remains unchanged over the last 14 years.
- Canadian adults in their 60s, 50s and 40s continue having the highest obesity prevalence, exceeding 30%, with the latter group demonstrating the most prominent increase in the obesity rate.
- Newfoundland and Labrador had the highest rates of obesity in Canada in 2017-18, with almost 4 out of 10 residents living with obesity; British Columbia had the lowest rate of obesity in Canada, but nevertheless, at least every fifth person was affected.

- Quebec and Alberta have had the largest increases in obesity prevalence, with relative increases of almost 30% between 2005 and 2017-18.
- Population obesity trends are expected to increase the severity of COVID-19 infection burden, morbidity and mortality across Canada.
- We cannot afford to ignore increasing rates of obesity and obesity-related comorbidities and their negative impact on health and well-being of the current Canadian population and our future generations. Our findings highlight the urgent need to identify, develop, implement and evaluate solutions for obesity prevention and management in Canada as well as funding for such efforts.

Confidential

## References

1. World Health Organization. Weekly epidemiological and operational updates. <https://www.who.int/emergencies/diseases/novel-coronavirus-2019/situation-reports/>. Published 2021.
2. Yang J, Tian C, Chen Y, Zhu C, Chi H, Li J. Obesity aggravates COVID-19: an updated systematic review and meta-analysis. *J Med Virol*. November 2020. doi:10.1002/jmv.26677
3. Soeroto AY, Soetedjo NN, Purwiga A, et al. Effect of increased BMI and obesity on the outcome of COVID-19 adult patients: A systematic review and meta-analysis. *Diabetes Metab Syndr*. 2020;14(6):1897-1904. doi:10.1016/j.dsx.2020.09.029
4. Sales-Peres SH de C, de Azevedo-Silva LJ, Bonato RCS, Sales-Peres M de C, Pinto AC da S, Santiago Junior JF. Coronavirus (SARS-CoV-2) and the risk of obesity for critically illness and ICU admitted: Meta-analysis of the epidemiological evidence. *Obes Res Clin Pract*. 2020;14(5):389-397. doi:10.1016/j.orcp.2020.07.007
5. Du Y, Lv Y, Zha W, Zhou N, Hong X. Association of body mass index (BMI) with critical COVID-19 and in-hospital mortality: A dose-response meta-analysis. *Metabolism*. 2021;117:154373. doi:10.1016/j.metabol.2020.154373
6. Kalligeros M, Shehadeh F, Mylona EK, et al. Association of Obesity with Disease Severity Among Patients with Coronavirus Disease 2019. *Obesity (Silver Spring)*. 2020;28(7):1200-1204. doi:10.1002/oby.22859
7. Földi M, Farkas N, Kiss S, et al. Obesity is a risk factor for developing critical condition in COVID-19 patients: A systematic review and meta-analysis. *Obes Rev an Off J Int Assoc Study Obes*. 2020;21(10):e13095. doi:10.1111/obr.13095
8. Yang J, Tian C, Chen Y, Zhu C, Chi H, Li J. Obesity aggravates COVID-19: An updated systematic review and meta-analysis. *J Med Virol*. 2021;93(5):2662-2674. doi:10.1002/jmv.26677
9. Huang Y, Lu Y, Huang Y-M, et al. Obesity in patients with COVID-19: a systematic review and meta-analysis. *Metabolism*. 2020;113:154378. doi:10.1016/j.metabol.2020.154378
10. Tamara A, Tahapary DL. Obesity as a predictor for a poor prognosis of COVID-19: A systematic review. *Diabetes Metab Syndr*. 2020;14(4):655-659. doi:10.1016/j.dsx.2020.05.020
11. Zhou Y, Yang Q, Chi J, et al. Comorbidities and the risk of severe or fatal outcomes associated with coronavirus disease 2019: A systematic review and meta-analysis. *Int J Infect Dis IJID Off Publ Int Soc Infect Dis*. 2020;99:47-56. doi:10.1016/j.ijid.2020.07.029
12. World Health Organization. Obesity and Overweight. Fact sheet. Updated 01 April 2020. *WHO Organ*. 2020:2561-2565.
13. *Obesity: Preventing and Managing the Global Epidemic. Report of a WHO Consultation*. Vol 894. Switzerland; 2000.
14. Tran BX, Nair A V, Kuhle S, Ohinmaa A, Veugelers PJ. Cost analyses of obesity in Canada:

- scope, quality, and implications. *Cost Eff Resour Alloc.* 2013;11(1):3. doi:10.1186/1478-7547-11-3
15. Bellou V, Belbasis L, Tzoulaki I, Evangelou E. Risk factors for type 2 diabetes mellitus: An exposure-wide umbrella review of meta-analyses. *PLoS One.* 2018;13(3):e0194127. doi:10.1371/journal.pone.0194127
  16. Schmidt M, Johannesdottir SA, Lemeshow S, et al. Obesity in young men, and individual and combined risks of type 2 diabetes, cardiovascular morbidity and death before 55 years of age: a Danish 33-year follow-up study. *BMJ Open.* 2013;3(4):e002698. doi:10.1136/bmjopen-2013-002698
  17. Li L, Liu D-W, Yan H-Y, Wang Z-Y, Zhao S-H, Wang B. Obesity is an independent risk factor for non-alcoholic fatty liver disease: evidence from a meta-analysis of 21 cohort studies. *Obes Rev an Off J Int Assoc Study Obes.* 2016;17(6):510-519. doi:10.1111/obr.12407
  18. Plotnikoff R, Karunamuni N, Lytvyak E, et al. Osteoarthritis prevalence and modifiable factors: a population study. *BMC Public Health.* 2015;15:1195. <http://www.pubmedcentral.nih.gov/articlerender.fcgi?artid=4666016&tool=pmcentrez&rendertype=abstract>.
  19. Pinto KRD, Feckingham CM, Hirakata VN. Obesity as a predictive factor for chronic kidney disease in adults: systematic review and meta-analysis. *Brazilian J Med Biol Res = Rev Bras Pesqui medicas e Biol.* 2021;54(4):e10022. doi:10.1590/1414-431X202010022
  20. Guh DP, Zhang W, Bansback N, Amarsi Z, Birmingham CL, Anis AH. The incidence of comorbidities related to obesity and overweight: a systematic review and meta-analysis. *BMC Public Health.* 2009;9:88. doi:10.1186/1471-2458-9-88
  21. Shiri R, Karppinen J, Leino-Arjas P, Solovieva S, Viikari-Juntura E. The Association Between Obesity and Low Back Pain: A Meta-Analysis. *Am J Epidemiol.* 2009;171(2):135-154. doi:10.1093/aje/kwp356
  22. Gasmi A, Peana M, Pivina L, et al. Interrelations between COVID-19 and other disorders. *Clin Immunol.* 2021;224:108651. doi:10.1016/j.clim.2020.108651
  23. Vanasse A, Demers M, Hemiari A, Courteau J. Obesity in Canada: where and how many? *Int J Obes (Lond).* 2006;30(4):677-683. doi:10.1038/sj.ijo.0803168
  24. Bélanger-Ducharme F, Tremblay A. Prevalence of obesity in Canada. *Obes Rev an Off J Int Assoc Study Obes.* 2005;6(3):183-186. doi:10.1111/j.1467-789X.2005.00179.x
  25. Janssen I. The public health burden of obesity in Canada. *Can J diabetes.* 2013;37(2):90-96. doi:10.1016/j.jcjd.2013.02.059
  26. Luo W, Morrison H, de Groh M, et al. The burden of adult obesity in Canada. *Chronic Dis Can.* 2007;27(4):135-144.
  27. Statistics Canada. *Overweight and Obese Adults, 2018. Health Fact Sheets. Catalogue No. 82-625-X ISSN 1920-9118.*; 2019. <https://www150.statcan.gc.ca/n1/pub/82-625-x/2019001/article/00005-eng.htm>.

- 1
- 2
- 3
- 4 28. Lebenbaum M, Zaric GS, Thind A, Sarma S. Trends in obesity and multimorbidity in Canada. *Prev Med (Baltim)*. 2018;116:173-179. doi:10.1016/j.ypmed.2018.08.025
- 5
- 6 29. Statistics Canada. 2006. Canadian Community Health Survey, 2005 [public-use microdata file].
- 7 Ottawa, Ontario: Statistics Canada. Health Statistics Division, Data Liberation Initiative [producer
- 8 and distributor].
- 9
- 10 30. Statistics Canada. 2009. Canadian Community Health Survey, 2007-2008 [public-use microdata
- 11 file]. Ottawa, Ontario: Statistics Canada. Health Statistics Division, Data Liberation Initiative
- 12 [producer and distributor].
- 13
- 14 31. Statistics Canada. 2011. Canadian Community Health Survey, 2009-2010 [public-use microdata
- 15 file]. Ottawa, Ontario: Statistics Canada. Health Statistics Division, Data Liberation Initiative
- 16 [producer and distributor].
- 17
- 18 32. Statistics Canada. 2013. Canadian Community Health Survey, 2011-2012: Annual component
- 19 [public-use microdata file]. Ottawa, Ontario: Statistics Canada. Health Statistics Division, Data
- 20 Liberation Initiative [producer and distributor].
- 21
- 22 33. Statistics Canada. 2016. Canadian Community Health Survey, 2013-2014: Annual component
- 23 [public-use microdata file]. Ottawa, Ontario: Statistics Canada. Health Statistics Division, Data
- 24 Liberation Initiative [producer and distributor].
- 25
- 26 34. Statistics Canada. Canadian Community Health Survey, 2015-2016: Annual Component [Public
- 27 use microdata file] Ottawa, Ontario: Health Statistics Division, Statistics Canada [producer]
- 28 Ottawa, Ontario: Data Liberation Initiative, Statistics Canada [distribu.
- 29
- 30 35. Statistics Canada. Canadian Community Health Survey, 2017-2018: Annual Component [Public
- 31 use microdata file] Ottawa, Ontario: Health Statistics Division, Statistics Canada [producer]
- 32 Ottawa, Ontario: Data Liberation Initiative, Statistics Canada [distribu.
- 33
- 34 36. Statistics Canada. Canadian Community Health Survey.
- 35 <https://www23.statcan.gc.ca/imdb/p2SV.pl?Function=getSurvey&SDDS=3226>.
- 36
- 37 37. Connor Gorber S, Shields M, Tremblay MS, McDowell I. The feasibility of establishing correction
- 38 factors to adjust self-reported estimates of obesity. *Heal reports*. 2008;19(3):71-82.
- 39
- 40 38. Shields M, Connor Gorber S, Janssen I, Tremblay MS. Bias in self-reported estimates of obesity in
- 41 Canadian health surveys: an update on correction equations for adults. *Heal reports*.
- 42 2011;22(3):35-45.
- 43
- 44 39. Navaneelan T, Janz T. *Adjusting the Scales: Obesity in the Canadian Population after Correcting*
- 45 *for Respondent Bias*. Statistics Canada; 2014.
- 46
- 47 40. Garrow JS, Webster J. Quetelet's index (W/H<sup>2</sup>) as a measure of fatness. *Int J Obes*. 1985.
- 48
- 49 41. Health Canada. *Canadian Guidelines for Body Weight Classification in Adults.*; 2003. doi:H49-
- 50 179/2003E
- 51
- 52 42. World Health Organization. Obesity and overweight. Obesity and overweight. Published 2018.
- 53
- 54 43. Statistics Canada. Canadian Community Health Survey (CCHS). Household weights
- 55
- 56
- 57
- 58
- 59
- 60

- documentation. [https://www23.statcan.gc.ca/imdb-bmdi/pub/document/3226\\_D57\\_T9\\_V1-eng.htm](https://www23.statcan.gc.ca/imdb-bmdi/pub/document/3226_D57_T9_V1-eng.htm).  
Published 2010.
44. IBM SPSS Inc. SPSS Statistics for Windows, Version 23.0. *IBM Corp Released 2015*. 2015.  
doi:10.1364/OFC.2014.M2H.4
  45. GraphPad. GraphPad Prism for Windows. <http://www.graphpad.com>.
  46. Tableau Public 2020.3. 2020. <https://public.tableau.com/en-us/s/download>.
  47. Ng M, Fleming T, Robinson M, et al. Global, regional, and national prevalence of overweight and obesity in children and adults during 1980–2013: a systematic analysis for the Global Burden of Disease Study 2013. *Lancet*. 2014;384(9945):766-781.
  48. Ford ES, Li C, Zhao G, Tsai J. Trends in obesity and abdominal obesity among adults in the United States from 1999-2008. *Int J Obes (Lond)*. 2011;35(5):736-743. doi:10.1038/ijo.2010.186
  49. Ogden CL, Carroll MD, Kit BK, Flegal KM. Prevalence of obesity in the United States, 2009-2010. *NCHS Data Brief*. 2012;(82):1-8.
  50. Zeng F, Dai C, Cai P, et al. A comparison study of SARS-CoV-2 IgG antibody between male and female COVID-19 patients: A possible reason underlying different outcome between sex. *J Med Virol*. 2020;92(10):2050-2054. doi:10.1002/jmv.25989
  51. Peckham H, de Grujter NM, Raine C, et al. Male sex identified by global COVID-19 meta-analysis as a risk factor for death and ICU admission. *Nat Commun*. 2020;11(1):6317.  
doi:10.1038/s41467-020-19741-6
  52. Bilandzic A, Rosella L. The cost of diabetes in Canada over 10 years: applying attributable health care costs to a diabetes incidence prediction model. *Heal Promot chronic Dis Prev Canada Res policy Pract*. 2017;37(2):49-53. doi:10.24095/hpcdp.37.2.03
  53. Padwal RS, Bienek A, McAlister FA, Campbell NRC. Epidemiology of Hypertension in Canada: An Update. *Can J Cardiol*. 2016;32(5):687-694. doi:10.1016/j.cjca.2015.07.734
  54. Ntritsos G, Franek J, Belbasis L, et al. Gender-specific estimates of COPD prevalence: a systematic review and meta-analysis. *Int J Chron Obstruct Pulmon Dis*. 2018;13:1507-1514.  
doi:10.2147/COPD.S146390
  55. Canadian Tobacco, Alcohol and Drugs Survey (CTADS). 2017. <https://www.canada.ca/en/health-canada/services/canadian-tobacco-alcohol-drugs-survey/2017-summary.html>.
  56. Lippi G, Wong J, Henry BM. Hypertension in patients with coronavirus disease 2019 (COVID-19): a pooled analysis. *Polish Arch Intern Med*. 2020;130(4):304-309. doi:10.20452/pamw.15272
  57. Mesas AE, Cavero-Redondo I, Álvarez-Bueno C, et al. Predictors of in-hospital COVID-19 mortality: A comprehensive systematic review and meta-analysis exploring differences by age, sex and health conditions. *PLoS One*. 2020;15(11):e0241742. doi:10.1371/journal.pone.0241742
  58. Zheng Z, Peng F, Xu B, et al. Risk factors of critical & mortal COVID-19 cases: A systematic literature review and meta-analysis. *J Infect*. 2020;81(2):e16-e25. doi:10.1016/j.jinf.2020.04.021
  59. Chen Y, Klein SL, Garibaldi BT, et al. Aging in COVID-19: Vulnerability, immunity and intervention.

- 1  
2  
3  
4  
5  
6  
7  
8  
9  
10  
11  
12  
13  
14  
15  
16  
17  
18  
19  
20  
21  
22  
23  
24  
25  
26  
27  
28  
29  
30  
31  
32  
33  
34  
35  
36  
37  
38  
39  
40  
41  
42  
43  
44  
45  
46  
47  
48  
49  
50  
51  
52  
53  
54  
55  
56  
57  
58  
59  
60
- Ageing Res Rev.* 2021;65:101205. doi:10.1016/j.arr.2020.101205
60. Wu C, Chen X, Cai Y, et al. Risk Factors Associated With Acute Respiratory Distress Syndrome and Death in Patients With Coronavirus Disease 2019 Pneumonia in Wuhan, China. *JAMA Intern Med.* 2020;180(7):934-943. doi:10.1001/jamainternmed.2020.0994
61. Onder G, Rezza G, Brusaferro S. Case-fatality rate and characteristics of patients dying in relation to COVID-19 in Italy. *Jama.* 2020;323(18):1775-1776.
62. Surveillances V. The epidemiological characteristics of an outbreak of 2019 novel coronavirus diseases (COVID-19)—China, 2020. *China CDC Wkly.* 2020;2(8):113-122.
63. Levin AT, Hanage WP, Owusu-Boaitey N, Cochran KB, Walsh SP, Meyerowitz-Katz G. Assessing the age specificity of infection fatality rates for COVID-19: systematic review, meta-analysis, and public policy implications. *Eur J Epidemiol.* 2020;35(12):1123-1138. doi:10.1007/s10654-020-00698-1
64. Government of Canada. *The Chief Public Health Officer's Report on the State of Public Health in Canada 2017 – Designing Healthy Living.*; 2017. <https://www.canada.ca/en/public-health/services/publications/chief-public-health-officer-reports-state-public-health-canada/2017-designing-healthy-living.html>.
65. Puska P, Vartiainen E, Nissinen A, Laatikainen T, Jousilahti P. Background, Principles, Implementation, and General Experiences of the North Karelia Project. *Glob Heart.* 2016. doi:10.1016/j.gheart.2016.04.010
66. Vartiainen E, Laatikainen T, Peltonen M, et al. Thirty-five-year trends in cardiovascular risk factors in Finland. *Int J Epidemiol.* 2010;39. doi:10.1093/ije/dyp330
67. Farquhar JW, Fortmann SP, Flora JA, et al. Effects of communitywide education on cardiovascular disease risk factors. The Stanford Five-City Project. *JAMA.* 1990;264. doi:10.1001/jama.1990.03450030083037
68. Luepker R V, Murray DM, Jacobs DR, et al. Community education for cardiovascular disease prevention: risk factor changes in the Minnesota Heart Health Program. *Am J Public Heal.* 1994;84. doi:10.2105/AJPH.84.9.1383
69. Carleton RA, Lasater TM, Assaf AR, Feldman HA, McKinlay S. The Pawtucket Heart Health Program: community changes in cardiovascular risk factors and projected disease risk. *Am J Public Heal.* 1995;85. doi:10.2105/AJPH.85.6.777
70. Lytvyak E, Olstad DL, Schopflocher DP, et al. Impact of a 3-year multi-centre community-based intervention on risk factors for chronic disease and obesity among free-living adults: the Healthy Alberta Communities study. *BMC Public Health.* 2016;16(1):1-15. doi:10.1186/s12889-016-3021-1
71. Raine KD, Plotnikoff R, Schopflocher D, et al. Healthy Alberta communities: Impact of a three-year community-based obesity and chronic disease prevention intervention. *Prev Med (Baltim).* 2013;57(6):955-962.
72. Lee K, Jones KS. The path well traveled: using mammalian retroviruses to guide research on



- XMRV. *Mol Interv.* 10(1):20-24. doi:10/1/20 [pii]10.1124/mi.10.1.5
73. Li W, Maduro GA, Begier EM. Increased Life Expectancy in New York City, 2001-2010: An Exploration by Cause of Death and Demographic Characteristics. *J Public Health Manag Pract.* 2016;22(3):255-264. doi:10.1097/PHH.0000000000000265
74. Rube K, Veatch M, Huang K, et al. Developing built environment programs in local health departments: lessons learned from a nationwide mentoring program. *Am J Public Health.* 2014;104(5):e10-e18. doi:10.2105/AJPH.2013.301863
75. Sekhobo J, Edmunds L, Whaley S, Koleilat M. Obesity prevalence among low-income, preschool-aged children—New York City and Los Angeles County, 2003–2011. *MMWR Morb Mortal Wkly Rep.* 2013;62(2):17.
76. The U.S. Department of Health and Human Services. The Guide to Community Preventive Services. The Community Preventive Services Task Force.
77. Lee KK. Planning and public health: the need to work together – again! *PLAN Canada (Centenary Ed).* 2019;59(1):202-208.
78. Kelly PM, Davies A, Greig AJM, Lee KK. Obesity Prevention in a City State: Lessons from New York City during the Bloomberg Administration. *Front public Heal.* 2016;4:60. doi:10.3389/fpubh.2016.00060
79. Designed to Move. Active Cities: A Guide for City Leaders. <http://www.drkarenlee.com/resources/who-citiesforhealth>. Published 2015.
80. Housing for Health. 2019. <https://www.folio.ca/new-housing-projects-aim-to-promote-healthier-living-by-design/>.
81. Chandrasekaran A. Body Mass Index-Is it Reliable Indicator of Obesity. *J Nutr Weight Loss.* 2018;2(111):2.
82. Okorodudu DO, Jumean MF, Montori VM, et al. Diagnostic performance of body mass index to identify obesity as defined by body adiposity: a systematic review and meta-analysis. *Int J Obes.* 2010;34(5):791-799. doi:10.1038/ijo.2010.5
83. Keys A, Fidanza F, Karvonen MJ, Kimura N, Taylor HL. Indices of relative weight and obesity. *Int J Epidemiol.* 2014;43(3):655-665.
84. Romero-Corral A, Somers VK, Sierra-Johnson J, et al. Accuracy of body mass index in diagnosing obesity in the adult general population. *Int J Obes.* 2008;32(6):959-966.
85. Nicholls SG. Standards and classification: a perspective on the “obesity epidemic”. *Soc Sci Med.* 2013;87:9-15. doi:10.1016/j.socscimed.2013.03.009
86. Palta M, Prineas RJ, Berman R, Hannan P. Comparison of self-reported and measured height and weight. *Am J Epidemiol.* 1982;115(2):223-230. doi:10.1093/oxfordjournals.aje.a113294
87. Abramowitz MK, Hall CB, Amodu A, Sharma D, Androga L, Hawkins M. Muscle mass, BMI, and mortality among adults in the United States: A population-based cohort study. *PLoS One.* 2018;13(4):e0194697. doi:10.1371/journal.pone.0194697

- 1  
2  
3  
4 88. Wilson OWA, Bopp CM, Papalia Z, Bopp M. Objective vs self-report assessment of height, weight  
5 and body mass index: Relationships with adiposity, aerobic fitness and physical activity. *Clin*  
6 *Obes*. 2019;9(5):e12331. doi:10.1111/cob.12331  
7  
8 89. Chau N, Chau K, Mayet A, Baumann M, Legleye S, Falissard B. Self-reporting and measurement  
9 of body mass index in adolescents: refusals and validity, and the possible role of socioeconomic  
10 and health-related factors. *BMC Public Health*. 2013;13:815. doi:10.1186/1471-2458-13-815  
11  
12 90. Connor Gorber S, Tremblay MS. The bias in self-reported obesity from 1976 to 2005: a Canada-  
13 US comparison. *Obesity (Silver Spring)*. 2010;18(2):354-361. doi:10.1038/oby.2009.206  
14  
15 91. Connor Gorber S, Tremblay M, Moher D, Gorber B. A comparison of direct vs. self-report  
16 measures for assessing height, weight and body mass index: a systematic review. *Obes Rev an*  
17 *Off J Int Assoc Study Obes*. 2007;8(4):307-326. doi:10.1111/j.1467-789X.2007.00347.x  
18  
19 92. Engstrom JL, Paterson SA, Doherty A, Trabulsi M, Speer KL. Accuracy of self-reported height and  
20 weight in women: an integrative review of the literature. *J Midwifery Womens Health*.  
21 2003;48(5):338-345.  
22  
23 93. Olfert MD, Barr ML, Charlier CM, et al. Self-Reported vs. Measured Height, Weight, and BMI in  
24 Young Adults. *Int J Environ Res Public Health*. 2018;15(10). doi:10.3390/ijerph15102216  
25  
26 94. Seijo M, Minckas N, Cormick G, Comandé D, Ciapponi A, Belizán JM. Comparison of self-  
27 reported and directly measured weight and height among women of reproductive age: a  
28 systematic review and meta-analysis. *Acta Obstet Gynecol Scand*. 2018;97(4):429-439.  
29 doi:10.1111/aogs.13326  
30  
31 95. McAdams MA, Van Dam RM, Hu FB. Comparison of self-reported and measured BMI as  
32 correlates of disease markers in US adults. *Obesity (Silver Spring)*. 2007;15(1):188-196.  
33 doi:10.1038/oby.2007.504  
34  
35 96. Fearon ER. Colorectal cancer: molecular genetic studies and their future clinical applications. *Med*  
36 *Pediatr Oncol Suppl*. 1996;1:35-40.  
37  
38 [http://www.ncbi.nlm.nih.gov/entrez/query.fcgi?cmd=Retrieve&db=PubMed&dopt=Citation&list\\_uids](http://www.ncbi.nlm.nih.gov/entrez/query.fcgi?cmd=Retrieve&db=PubMed&dopt=Citation&list_uids=8643046)  
39 [=8643046](http://www.ncbi.nlm.nih.gov/entrez/query.fcgi?cmd=Retrieve&db=PubMed&dopt=Citation&list_uids=8643046).  
40  
41  
42  
43  
44  
45  
46  
47  
48  
49  
50  
51  
52  
53  
54  
55  
56  
57  
58  
59  
60

Table 1. Demographic characteristics of the study participants, by the CCHS cycle, from 2005 through 2017-18.

| Parameter                           | 2005 |        | 2007-08 |        | 2009-10 |        | 2011-12 |        | 2013-14 |        | 2015-16 |       | 2017-18 |       |
|-------------------------------------|------|--------|---------|--------|---------|--------|---------|--------|---------|--------|---------|-------|---------|-------|
|                                     | %    | n      | %       | n      | %       | n      | %       | n      | %       | n      | %       | n     | %       | n     |
| <b>Total study population</b>       |      | 115787 |         | 113322 |         | 106950 |         | 107691 |         | 110349 |         | 94316 |         | 97993 |
| <b>Sex</b>                          |      |        |         |        |         |        |         |        |         |        |         |       |         |       |
| Female                              | 49.7 | 61970  | 50.0    | 61492  | 49.7    | 57993  | 49.9    | 59078  | 49.8    | 60648  | 49.7    | 50158 | 49.8    | 52243 |
| Male                                | 50.3 | 53817  | 50.0    | 51830  | 50.3    | 48957  | 50.1    | 48613  | 50.2    | 49701  | 50.3    | 44158 | 50.2    | 45750 |
| <b>Age categories</b>               |      |        |         |        |         |        |         |        |         |        |         |       |         |       |
| 18–19 y.o.                          | 3.3  | 3840   | 3.2     | 3223   | 3.2     | 3319   | 3.0     | 3084   | 3.0     | 2973   | 3.1     | 1976  | 3.0     | 1756  |
| 20–29 y.o.                          | 17.4 | 15961  | 17.4    | 13851  | 17.4    | 13934  | 17.5    | 13653  | 17.1    | 12703  | 16.1    | 10818 | 16.1    | 11174 |
| 30–39 y.o.                          | 17.4 | 19321  | 17.5    | 17856  | 16.6    | 15438  | 16.6    | 14304  | 16.7    | 13752  | 17.5    | 14235 | 17.9    | 14802 |
| 40–49 y.o.                          | 21.8 | 19756  | 20.8    | 18688  | 20.2    | 15680  | 18.4    | 14539  | 17.6    | 13116  | 17.4    | 13739 | 16.6    | 13757 |
| 50–59 y.o.                          | 17.4 | 20487  | 18.5    | 21638  | 18.9    | 20124  | 19.1    | 20309  | 19.5    | 20835  | 18.8    | 17388 | 18.0    | 17250 |
| 60–69 y.o.                          | 11.5 | 16788  | 12.0    | 18227  | 13.0    | 18927  | 14.3    | 21186  | 14.7    | 23596  | 15.5    | 18579 | 15.8    | 19877 |
| 70–79 y.o.                          | 7.6  | 12758  | 7.4     | 12879  | 7.2     | 12521  | 7.4     | 13079  | 8.0     | 15186  | 8.3     | 11829 | 9.0     | 13069 |
| ≥ 80 y.o.                           | 3.5  | 6876   | 3.2     | 6960   | 3.4     | 7007   | 3.6     | 7537   | 3.6     | 8188   | 3.3     | 5752  | 3.6     | 6308  |
| <b>Provinces/Territories</b>        |      |        |         |        |         |        |         |        |         |        |         |       |         |       |
| Alberta                             | 9.7  | 10151  | 10.3    | 10215  | 10.5    | 9924   | 10.9    | 9760   | 11.3    | 10434  | 11.6    | 11381 | 11.5    | 11732 |
| British Columbia                    | 13.3 | 13570  | 13.3    | 13718  | 13.4    | 12995  | 13.5    | 13418  | 13.3    | 13387  | 13.2    | 12419 | 13.2    | 13338 |
| Manitoba                            | 3.4  | 6353   | 3.3     | 6433   | 3.3     | 5837   | 3.4     | 5905   | 3.3     | 6337   | 3.3     | 4631  | 3.4     | 4719  |
| New Brunswick                       | 2.4  | 4512   | 2.3     | 4746   | 2.2     | 4215   | 2.2     | 4207   | 2.1     | 4279   | 2.1     | 2841  | 2.1     | 3182  |
| Newfoundland and Labrador           | 1.7  | 3587   | 1.6     | 3481   | 1.5     | 3243   | 1.5     | 3074   | 1.5     | 3410   | 1.5     | 2729  | 1.5     | 2804  |
| Nova Scotia                         | 2.9  | 4442   | 2.9     | 4486   | 2.8     | 4048   | 2.8     | 4011   | 2.7     | 4548   | 2.7     | 4105  | 2.6     | 4174  |
| Ontario                             | 38.8 | 36578  | 39.0    | 38137  | 38.9    | 36418  | 38.7    | 36640  | 38.4    | 36566  | 38.3    | 28024 | 38.5    | 28585 |
| Prince Edward Island                | 0.4  | 1751   | 0.4     | 2029   | 0.4     | 1612   | 0.4     | 1513   | 0.4     | 1695   | 0.4     | 1511  | 0.4     | 1653  |
| Quebec                              | 24.2 | 25980  | 23.9    | 20742  | 23.7    | 19862  | 23.6    | 20495  | 23.7    | 20675  | 23.8    | 20487 | 23.5    | 21447 |
| Saskatchewan                        | 2.9  | 6706   | 2.8     | 6633   | 2.8     | 6328   | 2.8     | 6132   | 2.9     | 6338   | 2.9     | 3970  | 2.9     | 4172  |
| Yukon/Northwest Territories/Nunavut | 0.3  | 2157   | 0.3     | 2702   | 0.3     | 2468   | 0.3     | 2536   | 0.3     | 2680   | 0.3     | 2218  | 0.3     | 2187  |

Notes: Data are based on weighted estimates

Table 2. Temporal dynamics in obesity, national and province/territory-specific estimates, adjusted, by the CCHS cycle, Canada, from 2005 through 2017-18.

| Parameter                              | 2005              |              |             |             | 2007-08           |              |             |             | 2009-10           |              |             |             | 2011-12           |              |             |             | 2013-14           |              |             |             | 2015-16          |              |             |             | 2017-18           |              |             |             | p-value, Pearson chi-square test | p-value, Cochran-Armitage test of trend |
|----------------------------------------|-------------------|--------------|-------------|-------------|-------------------|--------------|-------------|-------------|-------------------|--------------|-------------|-------------|-------------------|--------------|-------------|-------------|-------------------|--------------|-------------|-------------|------------------|--------------|-------------|-------------|-------------------|--------------|-------------|-------------|----------------------------------|-----------------------------------------|
|                                        | %                 | n            | 95% CI      |             | %                 | n            | 95% CI      |             | %                 | n            | 95% CI      |             | %                 | n            | 95% CI      |             | %                 | n            | 95% CI      |             | %                | n            | 95% CI      |             | %                 | n            | 95% CI      |             |                                  |                                         |
|                                        |                   |              | Lower bound | Upper bound |                   |              | Lower bound | Upper bound |                   |              | Lower bound | Upper bound |                   |              | Lower bound | Upper bound |                   |              | Lower bound | Upper bound |                  |              | Lower bound | Upper bound |                   |              | Lower bound | Upper bound |                                  |                                         |
| <b>Canada-wide, all sexes and ages</b> | <b>22.2</b>       | <b>28557</b> | 22.17       | 22.21       | <b>23.4</b>       | <b>30267</b> | 23.36       | 23.39       | <b>24.0</b>       | <b>29148</b> | 23.97       | 24.00       | <b>25.0</b>       | <b>30287</b> | 25.01       | 25.05       | <b>26.3</b>       | <b>32576</b> | 26.33       | 26.36       | <b>26.6</b>      | <b>28335</b> | 26.54       | 26.57       | <b>27.2</b>       | <b>30290</b> | 27.14       | 27.17       | <b>&lt;0.001</b>                 | <b>&lt;0.001</b>                        |
| <b>Sex-specific estimates</b>          |                   |              |             |             |                   |              |             |             |                   |              |             |             |                   |              |             |             |                   |              |             |             |                  |              |             |             |                   |              |             |             |                                  |                                         |
| Females                                | 20.4              | 14652        | 20.38       | 20.42       | 21.7              | 15710        | 21.70       | 21.75       | 22.0              | 15081        | 21.97       | 22.02       | 23.2              | 15842        | 23.17       | 23.21       | 23.9              | 16984        | 23.87       | 23.92       | 24.3             | 14281        | 24.26       | 24.31       | 25.4              | 15403        | 25.40       | 25.45       | <b>&lt;0.001</b>                 | <b>&lt;0.001</b>                        |
| Males                                  | 24.0              | 13905        | 23.93       | 23.98       | 25.0              | 14557        | 25.01       | 25.06       | 26.0              | 14067        | 25.93       | 25.98       | 26.9              | 14445        | 26.84       | 26.89       | 28.8              | 15592        | 28.75       | 28.80       | 28.8             | 14054        | 28.78       | 28.83       | 28.9              | 14887        | 28.84       | 28.89       | <b>&lt;0.001</b>                 | <b>&lt;0.001</b>                        |
| <b>Age-specific estimates</b>          |                   |              |             |             |                   |              |             |             |                   |              |             |             |                   |              |             |             |                   |              |             |             |                  |              |             |             |                   |              |             |             |                                  |                                         |
| 18 – 19 y.o.                           | 8.3               | 368          | 8.28        | 8.40        | 9.2               | 323          | 9.10        | 9.23        | 10.7              | 371          | 10.60       | 10.73       | 8.7               | 351          | 8.60        | 8.72        | 9.8               | 324          | 9.75        | 9.88        | 9.9 <sup>a</sup> | 240          | 9.86        | 9.99        | 9.9 <sup>a</sup>  | 212          | 9.88        | 10.01       | <b>&lt;0.001</b>                 | <b>&lt;0.001</b>                        |
| 20 – 29 y.o.                           | 14.7              | 2788         | 14.65       | 14.72       | 15.8              | 2649         | 15.72       | 15.79       | 16.2              | 2770         | 16.17       | 16.24       | 16.3              | 2673         | 16.26       | 16.33       | 17.8              | 2660         | 17.75       | 17.82       | 16.9             | 2216         | 16.91       | 16.98       | 17.5              | 2340         | 17.48       | 17.55       | <b>&lt;0.001</b>                 | <b>&lt;0.001</b>                        |
| 30 – 39 y.o.                           | 22.0              | 4757         | 21.91       | 21.99       | 22.9              | 4754         | 22.85       | 22.93       | 22.5              | 4088         | 22.42       | 22.50       | 23.8              | 3951         | 23.78       | 23.86       | 26.7              | 4025         | 26.63       | 26.71       | 26.0             | 4078         | 25.96       | 26.04       | 26.8              | 4370         | 26.79       | 26.87       | <b>&lt;0.001</b>                 | <b>&lt;0.001</b>                        |
| 40 – 49 y.o.                           | 23.8              | 5142         | 23.74       | 23.81       | 24.2              | 5194         | 24.17       | 24.25       | 25.8              | 4461         | 25.75       | 25.82       | 28.2 <sup>b</sup> | 4433         | 28.14       | 28.22       | 28.2 <sup>b</sup> | 4165         | 28.14       | 28.23       | 30.2             | 4603         | 30.18       | 30.27       | 30.9              | 4683         | 30.82       | 30.91       | <b>&lt;0.001</b>                 | <b>&lt;0.001</b>                        |
| 50 – 59 y.o.                           | 27.8              | 6239         | 27.72       | 27.81       | 28.6              | 6738         | 28.57       | 28.66       | 29.3              | 6548         | 29.21       | 29.29       | 30.3              | 6655         | 30.22       | 30.30       | 31.2              | 7102         | 31.19       | 31.27       | 31.5             | 5984         | 31.49       | 31.57       | 31.4              | 6157         | 31.36       | 31.44       | <b>&lt;0.001</b>                 | <b>&lt;0.001</b>                        |
| 60 – 69 y.o.                           | 28.0              | 5004         | 27.99       | 28.10       | 30.3              | 5936         | 30.25       | 30.35       | 30.2              | 6224         | 30.14       | 30.24       | 30.9              | 7136         | 30.82       | 30.91       | 31.8              | 8133         | 31.72       | 31.81       | 31.2             | 6480         | 31.20       | 31.29       | 32.3              | 6996         | 32.25       | 32.34       | <b>&lt;0.001</b>                 | <b>&lt;0.001</b>                        |
| 70 – 79 y.o.                           | 22.9              | 3134         | 22.80       | 22.92       | 24.8              | 3452         | 24.78       | 24.91       | 25.4              | 3404         | 25.29       | 25.42       | 26.7              | 3735         | 26.65       | 26.78       | 27.2              | 4562         | 27.15       | 27.27       | 28.1             | 3573         | 28.09       | 28.21       | 29.4              | 4173         | 29.36       | 29.47       | <b>&lt;0.001</b>                 | <b>&lt;0.001</b>                        |
| ≥ 80 y.o.                              | 15.5              | 1125         | 15.39       | 15.54       | 16.7              | 1221         | 16.58       | 16.74       | 17.0              | 1282         | 16.91       | 17.07       | 16.2              | 1353         | 16.14       | 16.29       | 19.5 <sup>c</sup> | 1605         | 19.43       | 19.59       | 18.4             | 1161         | 18.29       | 18.46       | 19.5 <sup>c</sup> | 1359         | 19.43       | 19.58       | <b>&lt;0.001</b>                 | <b>&lt;0.001</b>                        |
| <b>Province-specific estimates</b>     |                   |              |             |             |                   |              |             |             |                   |              |             |             |                   |              |             |             |                   |              |             |             |                  |              |             |             |                   |              |             |             |                                  |                                         |
| Newfoundland and Labrador              | 33.5              | 1146         | 33.36       | 33.66       | 32.5              | 1168         | 32.32       | 32.62       | 36.6              | 1192         | 36.45       | 36.75       | 35.7              | 1097         | 35.54       | 35.84       | 38.9              | 1274         | 38.76       | 39.06       | 41.0             | 1140         | 40.86       | 41.17       | 39.4              | 1146         | 39.21       | 39.52       | <b>&lt;0.001</b>                 | <b>&lt;0.001</b>                        |
| Prince Edward Island                   | 30.1 <sup>d</sup> | 514          | 29.85       | 30.41       | 29.9 <sup>d</sup> | 591          | 29.60       | 30.16       | 27.7              | 461          | 27.38       | 27.93       | 32.7 <sup>e</sup> | 492          | 32.40       | 32.97       | 32.9 <sup>e</sup> | 546          | 32.60       | 33.16       | 30.9             | 490          | 30.64       | 31.19       | 34.2              | 563          | 33.95       | 34.51       | <b>&lt;0.001</b>                 | <b>&lt;0.001</b>                        |
| Nova Scotia                            | 28.0              | 1312         | 27.86       | 28.07       | 31.1              | 1400         | 30.99       | 31.21       | 31.5              | 1292         | 31.43       | 31.65       | 33.0              | 1323         | 32.89       | 33.11       | 34.6 <sup>f</sup> | 1537         | 34.45       | 34.67       | 34.2             | 1468         | 34.14       | 34.36       | 34.7 <sup>f</sup> | 1498         | 34.58       | 34.80       | <b>&lt;0.001</b>                 | <b>&lt;0.001</b>                        |
| New Brunswick                          | 30.9 <sup>g</sup> | 1346         | 30.81       | 31.05       | 31.1 <sup>g</sup> | 1476         | 30.96       | 31.21       | 36.2              | 1449         | 36.07       | 36.32       | 33.8              | 1451         | 33.72       | 33.96       | 34.6              | 1461         | 34.43       | 34.68       | 38.7             | 1095         | 38.60       | 38.86       | 36.7              | 1162         | 36.54       | 36.79       | <b>&lt;0.001</b>                 | <b>&lt;0.001</b>                        |
| Quebec                                 | 20.1              | 5336         | 20.11       | 20.18       | 21.3              | 4668         | 21.31       | 21.38       | 22.1              | 4587         | 22.03       | 22.10       | 23.1              | 4807         | 23.06       | 23.12       | 24.9              | 5340         | 24.85       | 24.92       | 24.8             | 5350         | 24.73       | 24.80       | 26.0              | 5862         | 26.01       | 26.08       | <b>&lt;0.001</b>                 | <b>&lt;0.001</b>                        |
| Ontario                                | 21.9              | 9032         | 21.91       | 21.96       | 23.6              | 10265        | 23.52       | 23.58       | 24.1              | 9873         | 24.05       | 24.11       | 25.1              | 10272        | 25.06       | 25.12       | 26.1 <sup>h</sup> | 10850        | 26.11       | 26.17       | 26.3             | 8492         | 26.26       | 26.31       | 26.2 <sup>h</sup> | 8937         | 26.15       | 26.20       | <b>&lt;0.001</b>                 | <b>&lt;0.001</b>                        |
| Manitoba                               | 25.4              | 1802         | 25.27       | 25.46       | 26.9              | 2019         | 26.81       | 27.00       | 30.1              | 1854         | 30.04       | 30.24       | 28.0              | 1966         | 27.90       | 28.09       | 32.5              | 2144         | 32.41       | 32.61       | 30.8             | 1588         | 30.70       | 30.90       | 30.0              | 1614         | 29.89       | 30.08       | <b>&lt;0.001</b>                 | <b>&lt;0.001</b>                        |
| Saskatchewan                           | 29.0              | 2051         | 28.92       | 29.14       | 31.1              | 2113         | 31.03       | 31.25       | 28.7              | 2050         | 28.59       | 28.80       | 31.7              | 2092         | 31.58       | 31.80       | 32.9              | 2235         | 32.83       | 33.04       | 31.5             | 1400         | 31.37       | 31.57       | 35.4              | 1556         | 35.26       | 35.47       | <b>&lt;0.001</b>                 | <b>&lt;0.001</b>                        |
| Alberta                                | 22.9              | 2622         | 22.87       | 22.98       | 25.3              | 2901         | 25.20       | 25.31       | 24.7              | 2848         | 24.60       | 24.70       | 26.1              | 2923         | 26.01       | 26.12       | 27.2              | 3177         | 27.19       | 27.29       | 28.1             | 3494         | 28.03       | 28.13       | 29.2              | 3765         | 29.18       | 29.28       | <b>&lt;0.001</b>                 | <b>&lt;0.001</b>                        |
| British Columbia                       | 19.2              | 2781         | 19.14       | 19.23       | 18.2              | 2882         | 18.14       | 18.23       | 18.8              | 2856         | 18.74       | 18.83       | 20.6              | 3070         | 20.58       | 20.67       | 21.1              | 3181         | 21.01       | 21.09       | 21.6             | 3062         | 21.57       | 21.65       | 22.8              | 3409         | 22.78       | 22.87       | <b>&lt;0.001</b>                 | <b>&lt;0.001</b>                        |
| Yukon/Northwest Territories/Nunavut    | 29.3 <sup>i</sup> | 615          | 28.93       | 29.64       | 30.0              | 784          | 29.63       | 30.36       | 29.5 <sup>i</sup> | 686          | 29.10       | 29.80       | 31.9              | 794          | 31.51       | 32.21       | 34.1              | 831          | 33.79       | 34.47       | 35.9             | 756          | 35.60       | 36.28       | 36.9              | 778          | 36.58       | 37.24       | <b>&lt;0.001</b>                 | <b>&lt;0.001</b>                        |

Notes: Data are based on adjusted and weighted estimates.

Proportions compared across CCHS cycles using a two-tailed Pearson chi-square test with subsequent cycle-to-cycle pairwise comparisons using a two-tailed Pearson chi-square test with p-value adjustment for multiple testing according to the Bonferroni method. All pairwise comparisons between CCHS cycles demonstrate a statistically significant difference in proportions with  $p < 0.05$ , except for those cycles indicated by paired tags with superscript letters (a, b, c, etc.). A Cochran-Armitage test of trend shows a significantly increasing trend in obesity prevalence at Canada-wide and all provincial/territorial levels ( $p < 0.001$ ).

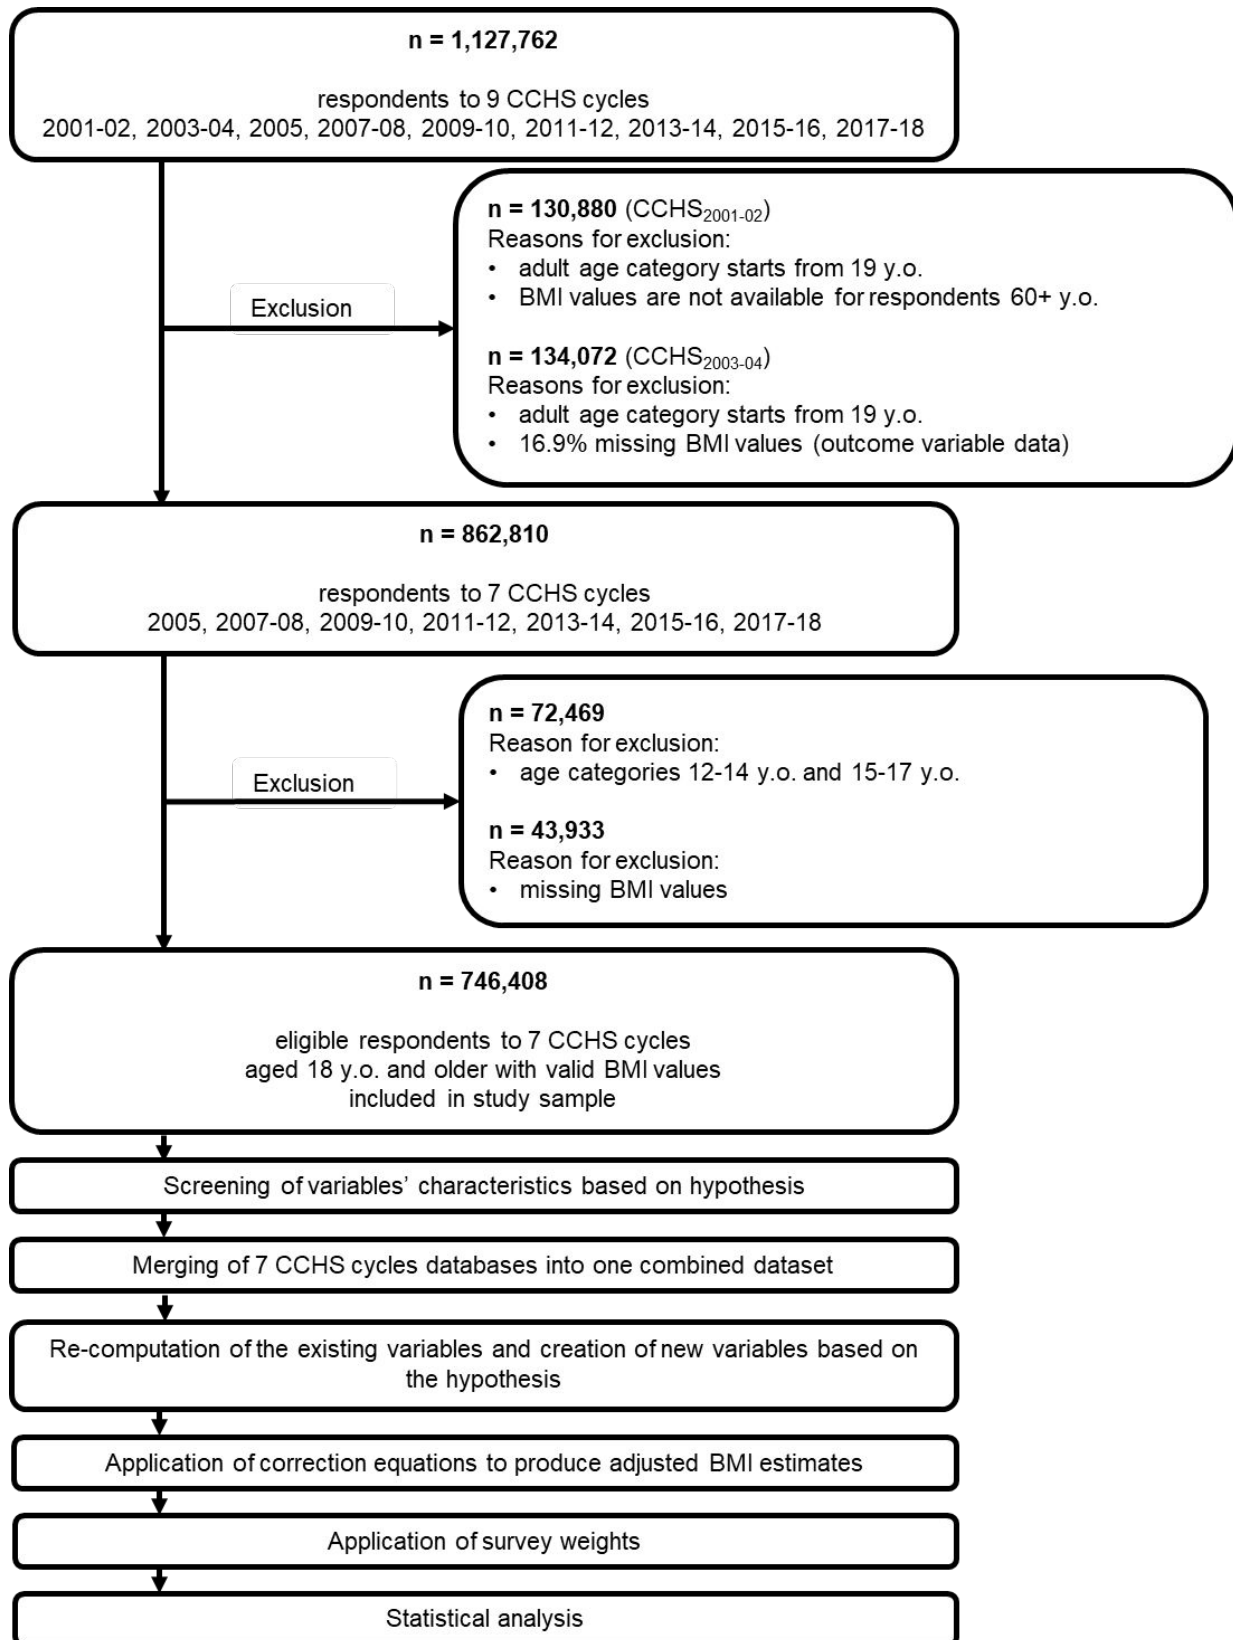

Figure 1. Flow chart outlining the step-wise methodological approach to the study.

1  
2  
3  
4  
5  
6  
7  
8  
9  
10  
11  
12  
13  
14  
15  
16  
17  
18  
19  
20  
21  
22  
23  
24  
25  
26  
27  
28  
29  
30  
31  
32  
33  
34  
35  
36  
37  
38  
39  
40  
41  
42  
43  
44  
45  
46  
47  
48  
49  
50  
51  
52  
53  
54  
55  
56  
57  
58  
59  
60

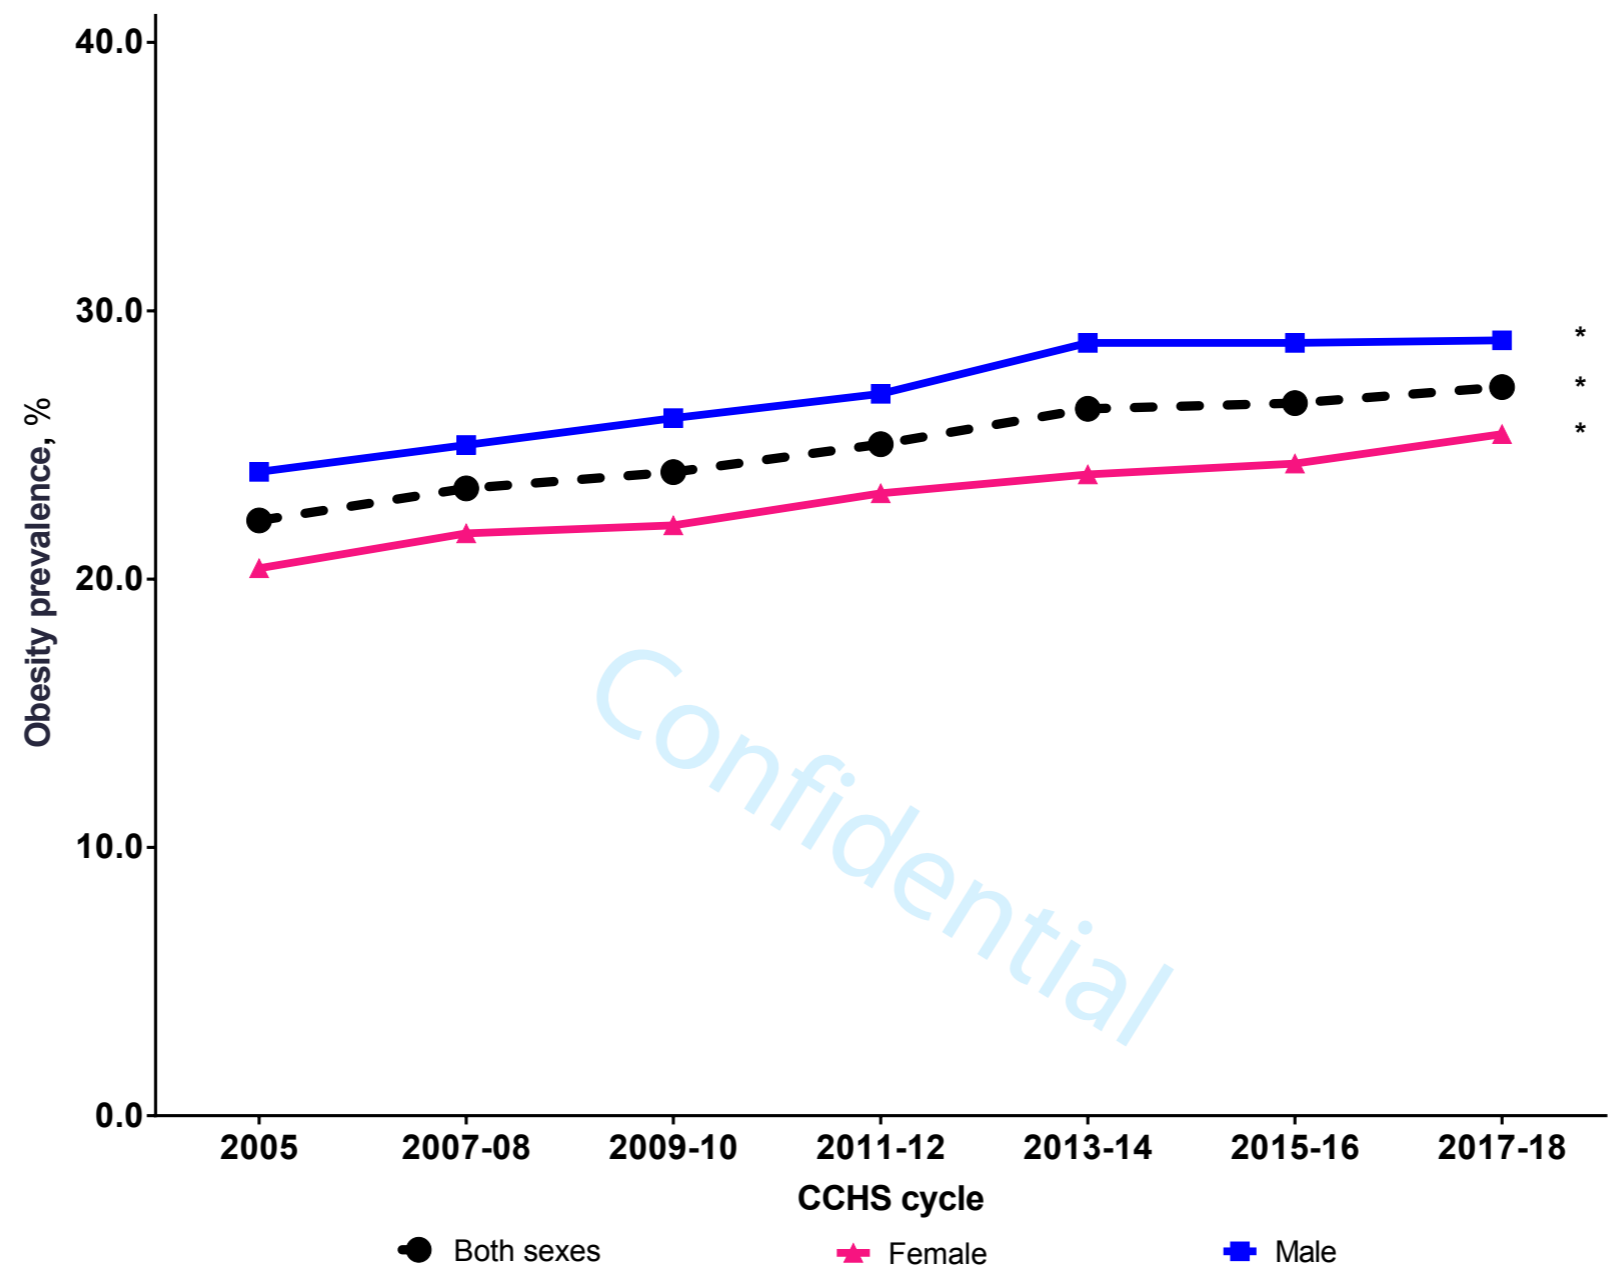

Figure 2. Trends in obesity prevalence among adults, by sex, Canada, from 2005 through 2017-18 (asterisks denote statistically significant increasing trend; p<0.001).

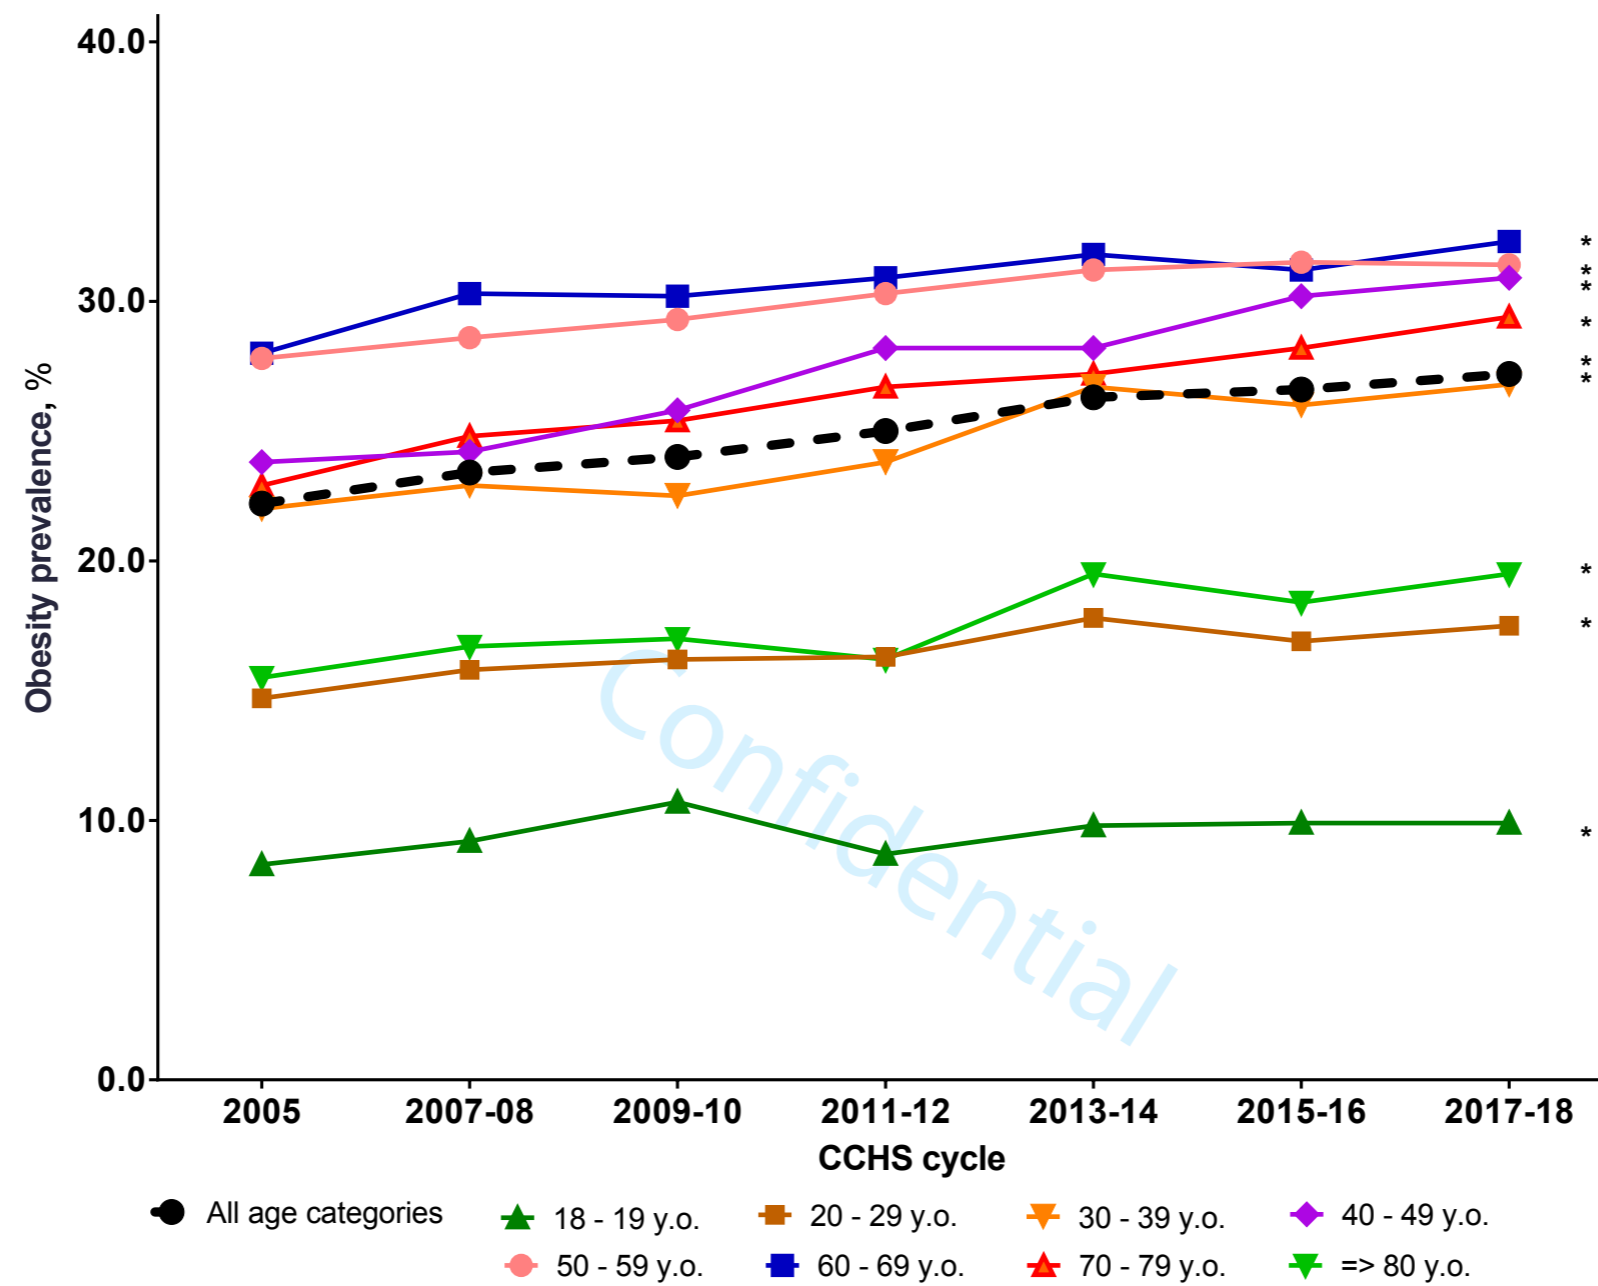

Figure 3. Trends in obesity prevalence among adults, by age categories, Canada, from 2005 through 2017-18 (asterisks denote statistically significant increasing trend; p<0.001).

1  
2  
3  
4  
5  
6  
7  
8  
9  
10  
11  
12  
13  
14  
15  
16  
17  
18  
19  
20  
21  
22  
23  
24  
25  
26  
27  
28  
29  
30  
31  
32  
33  
34  
35  
36  
37  
38  
39  
40  
41  
42  
43  
44  
45  
46  
47  
48  
49  
50  
51  
52  
53  
54  
55  
56  
57  
58  
59  
60

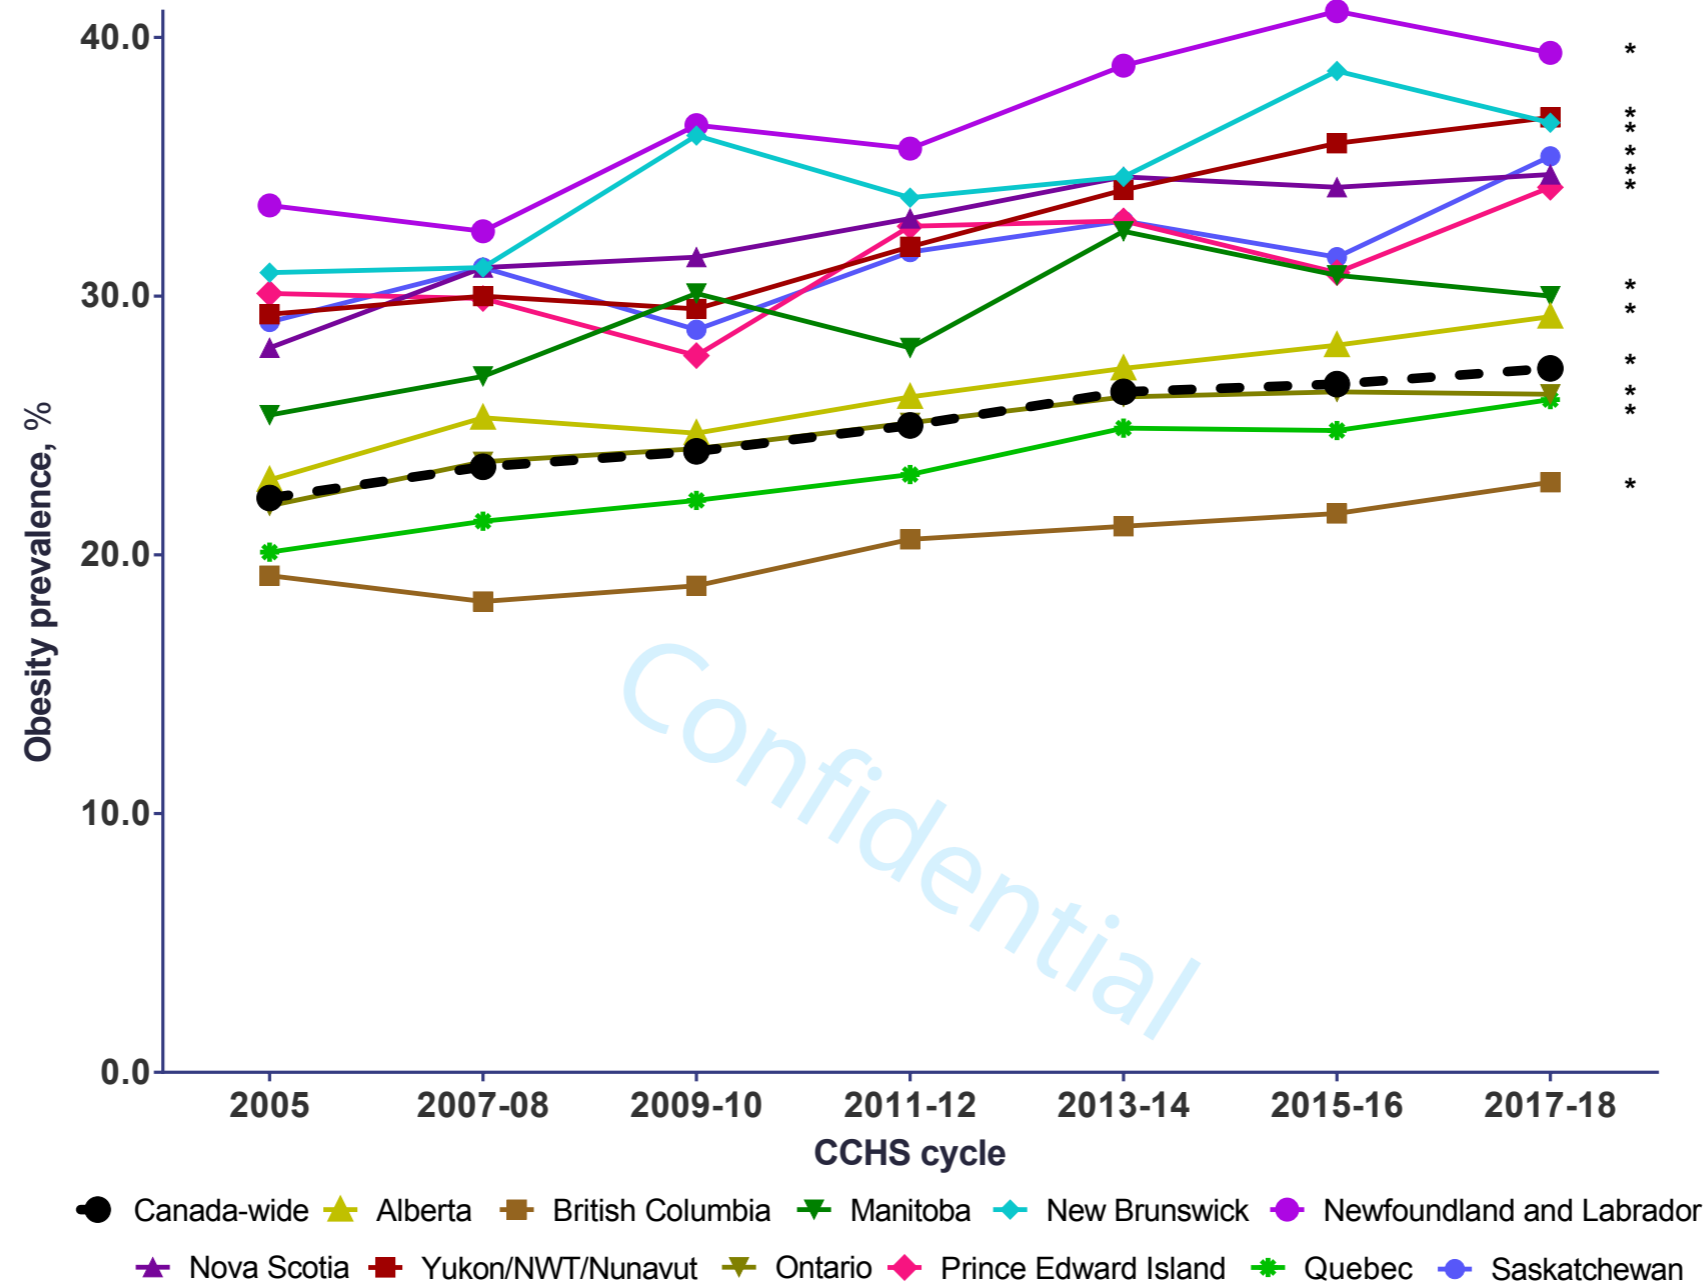

Figure 4. Trends in obesity prevalence among adults, by province/territory, Canada, from 2005 through 2017-18 (asterisks denote statistically significant increasing trend; p<0.001).



2005

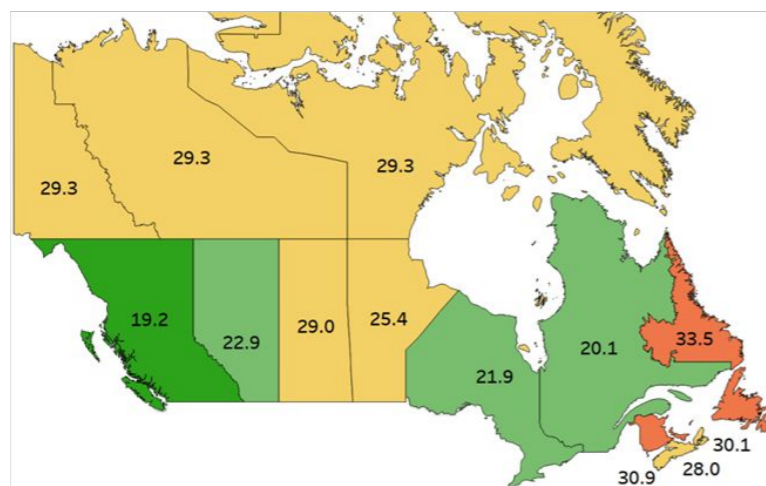

2007-2008

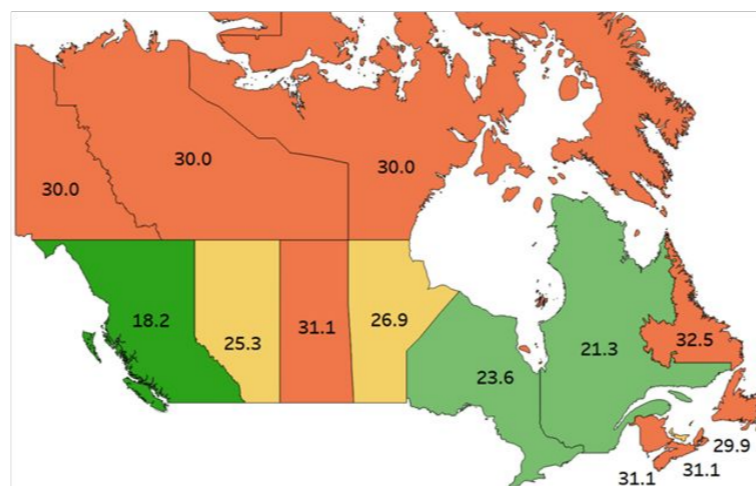

2009-2010

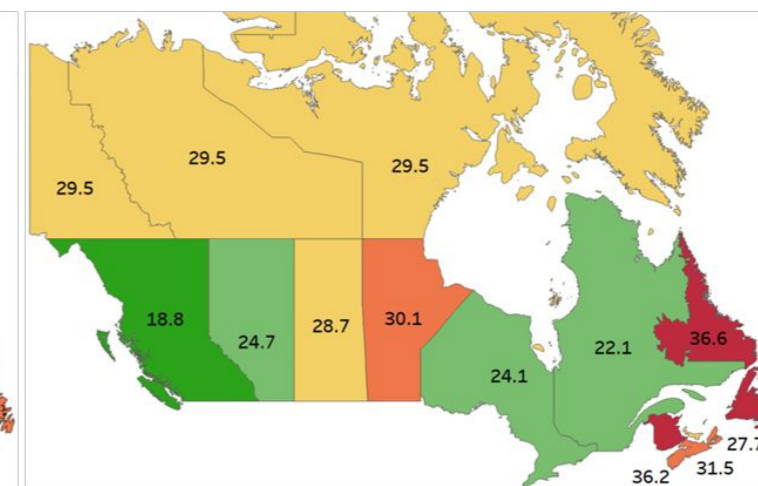

2011-2012

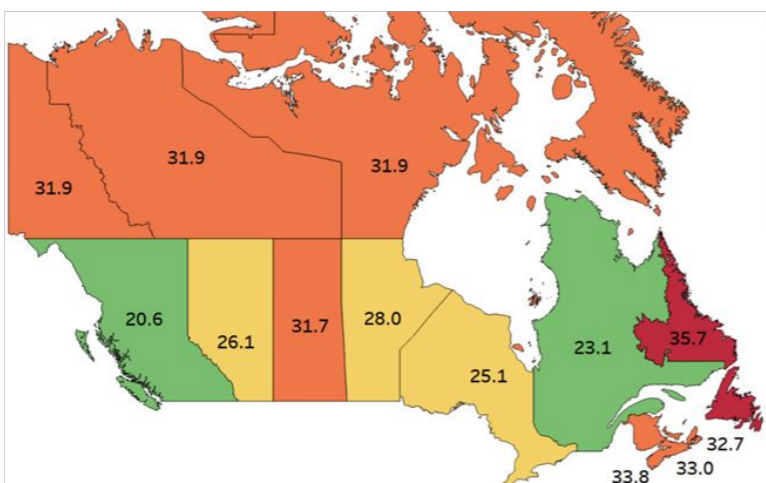

2013-2014

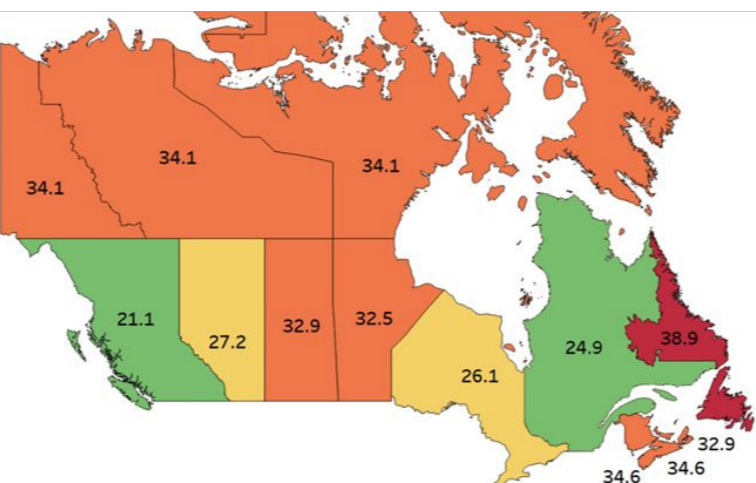

2015-2016

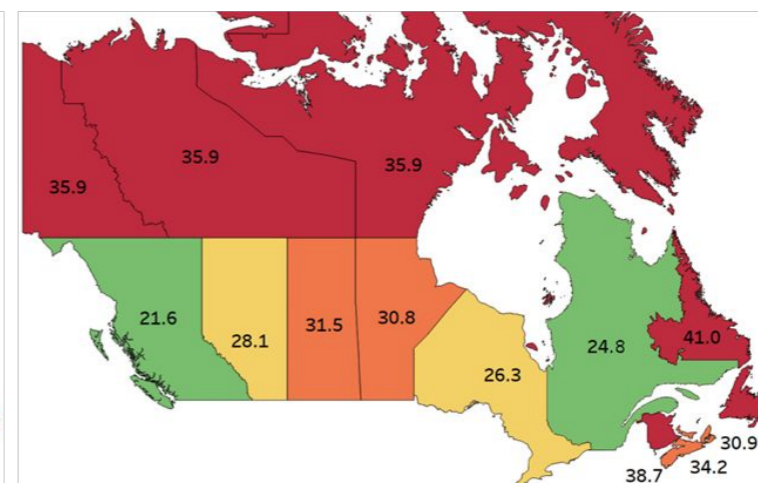

2017-2018

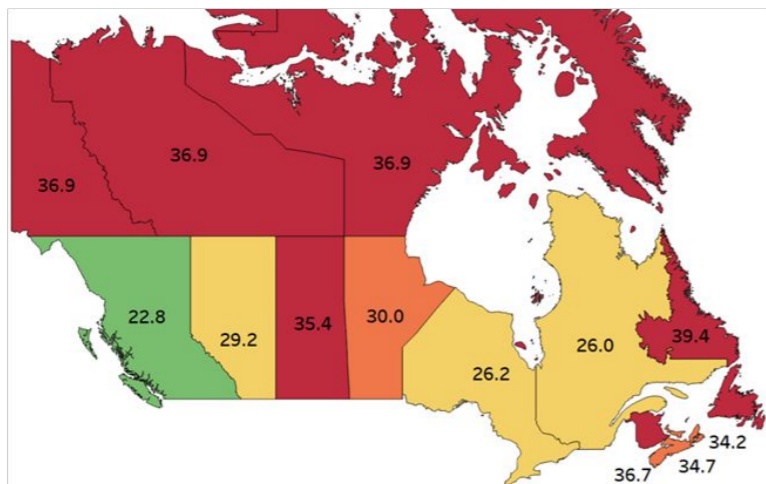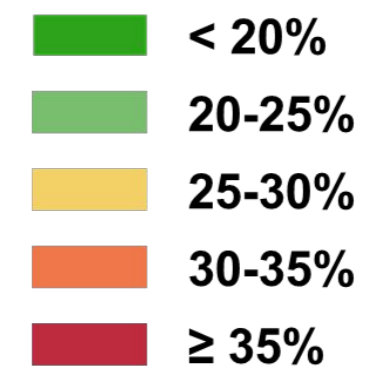

1  
2  
3  
4  
5  
6  
7  
8  
9  
10  
11  
12  
13  
14  
15  
16  
17  
18  
19  
20  
21  
22  
23  
24  
25  
26  
27  
28  
29  
30  
31  
32  
33  
34  
35  
36  
37  
38  
39  
40  
41  
42  
43  
44  
45  
46  
47  
48  
49  
50  
51  
52  
53  
54  
55  
56  
57  
58  
59  
60

1  
2  
3  
4  
5  
6  
7  
8  
9  
10  
11  
12  
13  
14  
15  
16  
17  
18  
19  
20  
21  
22  
23  
24  
25  
26  
27  
28  
29  
30  
31  
32  
33  
34  
35  
36  
37  
38  
39  
40  
41  
42  
43  
44  
45  
46  
47  
48  
49  
50  
51  
52  
53  
54  
55  
56  
57  
58  
59  
60

Figure 6. Obesity prevalence among Canadian adults, from 2005 through 2017-18.

Confidential

|    |                    |                     |                                                                   |     |
|----|--------------------|---------------------|-------------------------------------------------------------------|-----|
| 1  | Generalisability   | <a href="#">#21</a> | Discuss the generalisability (external validity) of the study     | N/A |
| 2  |                    |                     | results                                                           |     |
| 3  |                    |                     |                                                                   |     |
| 4  |                    |                     |                                                                   |     |
| 5  | <b>Other</b>       |                     |                                                                   |     |
| 6  | <b>Information</b> |                     |                                                                   |     |
| 7  |                    |                     |                                                                   |     |
| 8  |                    |                     |                                                                   |     |
| 9  | Funding            | <a href="#">#22</a> | Give the source of funding and the role of the funders for the    | 1   |
| 10 |                    |                     | present study and, if applicable, for the original study on which |     |
| 11 |                    |                     | the present article is based                                      |     |
| 12 |                    |                     |                                                                   |     |

13  
14 The STROBE checklist is distributed under the terms of the Creative Commons Attribution License  
15 CC-BY. This checklist was completed on 03 August 2021 using <https://www.goodreports.org/>, a tool  
16 made by the [EQUATOR Network](#) in collaboration with [Penelope.ai](#)  
17  
18  
19  
20  
21  
22  
23  
24  
25  
26  
27  
28  
29  
30  
31  
32  
33  
34  
35  
36  
37  
38  
39  
40  
41  
42  
43  
44  
45  
46  
47  
48  
49  
50  
51  
52  
53  
54  
55  
56  
57  
58  
59  
60

Confidential

|    |                    |                     |                                                                   |     |
|----|--------------------|---------------------|-------------------------------------------------------------------|-----|
| 1  | Generalisability   | <a href="#">#21</a> | Discuss the generalisability (external validity) of the study     | N/A |
| 2  |                    |                     | results                                                           |     |
| 3  |                    |                     |                                                                   |     |
| 4  |                    |                     |                                                                   |     |
| 5  | <b>Other</b>       |                     |                                                                   |     |
| 6  | <b>Information</b> |                     |                                                                   |     |
| 7  |                    |                     |                                                                   |     |
| 8  |                    |                     |                                                                   |     |
| 9  | Funding            | <a href="#">#22</a> | Give the source of funding and the role of the funders for the    | 1   |
| 10 |                    |                     | present study and, if applicable, for the original study on which |     |
| 11 |                    |                     | the present article is based                                      |     |
| 12 |                    |                     |                                                                   |     |

13  
14 The STROBE checklist is distributed under the terms of the Creative Commons Attribution License  
15 CC-BY. This checklist was completed on 03 August 2021 using <https://www.goodreports.org/>, a tool  
16 made by the [EQUATOR Network](#) in collaboration with [Penelope.ai](#)  
17  
18  
19  
20  
21  
22  
23  
24  
25  
26  
27  
28  
29  
30  
31  
32  
33  
34  
35  
36  
37  
38  
39  
40  
41  
42  
43  
44  
45  
46  
47  
48  
49  
50  
51  
52  
53  
54  
55  
56  
57  
58  
59  
60

Confidential
